# Supplementary material
Source: publisher figshare collection journal article supplement (https://tandf.figshare.com/ndownloader/files/22305780)
Supplement: Supplementary file 1 [file 22305780]

**Chemical Constituents from the Thorns of *Gleditsia sinensis* and Their Cytotoxic Activities**

**List of Supporting information Pages**

[**Structural identification for 3-25 1**](#_Toc31360687)

[**Fig. S2. HRESIMS of 1 3**](#_Toc31360688)

[**Fig. S3. UV spectrum of 1 (CH3OH) 3**](#_Toc31360689)

[**Fig. S4. IR spectrum of 1 (KBr disc) 4**](#_Toc31360690)

[**Fig. S5. 1H NMR spectrum of 1 in DMSO 4**](#_Toc31360691)

[**Fig. S6. 13C NMR spectrum of 1 in DMSO 5**](#_Toc31360692)

[**Fig. S7. DEPT-135 spectrum of 1 in DMSO 5**](#_Toc31360693)

[**Fig. S8. 1H-1H COSY spectrum of 1 in DMSO 6**](#_Toc31360694)

[**Fig. S9. HSQC spectrum of 1 in DMSO 6**](#_Toc31360695)

[**Fig. S10. HMBC spectrum of 1 in DMSO 7**](#_Toc31360696)

[**Fig. S11. NOESY spectrum of 1 in DMSO 7**](#_Toc31360697)

[**Fig. S12. HRESIMS of 2 8**](#_Toc31360698)

[**Fig. S13. UV spectrum of 2 (CH3OH) 8**](#_Toc31360699)

[**Fig. S14. IR spectrum of 2 (KBr disc) 9**](#_Toc31360700)

[**Fig. S15. 1H NMR spectrum of 2 in CD3OD 9**](#_Toc31360701)

[**Fig. S16. 13C NMR spectrum of 2 in CD3OD 10**](#_Toc31360702)

[**Fig. S17. DEPT-135 spectrum of 2 in CD3OD 10**](#_Toc31360703)

[**Fig. S18. 1H-1H COSY spectrum of 2 in CD3OD 11**](#_Toc31360704)

[**Fig. S19. HSQC spectrum of 2 in CD3OD 11**](#_Toc31360705)

[**Fig. S20. HMBC spectrum of 2 in CD3OD 12**](#_Toc31360706)

[**Fig. S21. NOESY spectrum of 2 in CD3OD 12**](#_Toc31360707)

[**Fig. S22. 1H NMR spectrum of 3 in CD3OD 13**](#_Toc31360708)

[**Fig. S23. 13C NMR spectrum of 3 in CD3OD 13**](#_Toc31360709)

[**Fig. S24. 1H NMR spectrum of 4 in DMSO 14**](#_Toc31360710)

[**Fig. S25. 13C NMR spectrum of 4 in DMSO 14**](#_Toc31360711)

[**Fig. S26. 1H NMR spectrum of 5 in CD3OD 15**](#_Toc31360712)

[**Fig. S27. 13C NMR spectrum of 5 in CD3OD 15**](#_Toc31360713)

[**Fig. S28. 1H NMR spectrum of 6 in CD3OD 16**](#_Toc31360714)

[**Fig. S29. 13C NMR spectrum of 6 in CD3OD 16**](#_Toc31360715)

[**Fig. S30. 1H NMR spectrum of 7 in CD3OD 17**](#_Toc31360716)

[**Fig. S31. 13C NMR spectrum of 7 in CD3OD 17**](#_Toc31360717)

[**Fig. S32. 1H NMR spectrum of 8 in CD3OD 18**](#_Toc31360718)

[**Fig. S33. 13C NMR spectrum of 8 in CD3OD 18**](#_Toc31360719)

[**Fig. S34. 1H NMR spectrum of 9 in CDCl3 19**](#_Toc31360720)

[**Fig. S35. 13C NMR spectrum of 9 in CDCl3 19**](#_Toc31360721)

[**Fig. S36. 1H NMR spectrum of 10 in CD3OD 20**](#_Toc31360722)

[**Fig. S37. 13C NMR spectrum of 10 in CD3OD 20**](#_Toc31360723)

[**Fig. S38. 1H NMR spectrum of 11 in CD3OD 21**](#_Toc31360724)

[**Fig. S39. 13C NMR spectrum of 11 in CD3OD 21**](#_Toc31360725)

[**Fig. S40. 1H NMR spectrum of 12 in CD3OD 22**](#_Toc31360726)

[**Fig. S41. 13C NMR spectrum of 12 in CD3OD 22**](#_Toc31360727)

[**Fig. S42. 1H NMR spectrum of 13 in CD3OD 23**](#_Toc31360728)

[**Fig. S43. 13C NMR spectrum of 13 in CD3OD 23**](#_Toc31360729)

[**Fig. S44. 1H NMR spectrum of 14 in CD3OD 24**](#_Toc31360730)

[**Fig. S45. 13C NMR spectrum of 14 in CD3OD 24**](#_Toc31360731)

[**Fig. S46. 1H NMR spectrum of 15 in CD3OD 25**](#_Toc31360732)

[**Fig. S47. 13C NMR spectrum of 15 in CD3OD 25**](#_Toc31360733)

[**Fig. S48. 1H NMR spectrum of 16 in CD3OD 26**](#_Toc31360734)

[**Fig. S49. 13C NMR spectrum of 16 in CD3OD 26**](#_Toc31360735)

[**Fig. S50. 1H NMR spectrum of 17 in CD3OD 27**](#_Toc31360736)

[**Fig. S51. 13C NMR spectrum of 17 in CD3OD 27**](#_Toc31360737)

[**Fig. S52. 1H NMR spectrum of 18 in CD3OD 28**](#_Toc31360738)

[**Fig. S53. 13C NMR spectrum of 18 in CD3OD 28**](#_Toc31360739)

[**Fig. S54. 1H NMR spectrum of 19 in CD3OD 29**](#_Toc31360740)

[**Fig. S55. 13C NMR spectrum of 19 in CD3OD 29**](#_Toc31360741)

[**Fig. S56. 1H NMR spectrum of 20 in CD3OD 30**](#_Toc31360742)

[**Fig. S57. 13C NMR spectrum of 20 in CD3OD 30**](#_Toc31360743)

[**Fig. S58. 1H NMR spectrum of 21 in CD3OD 31**](#_Toc31360744)

[**Fig. S59. 13C NMR spectrum of 21 in CD3OD 31**](#_Toc31360745)

[**Fig. S60. 1H NMR spectrum of 22 in CDCl3 32**](#_Toc31360746)

[**Fig. S61. 13C NMR spectrum of 22 in CDCl3 32**](#_Toc31360747)

[**Fig. S62. 1H NMR spectrum of 23 in CDCl3 33**](#_Toc31360748)

[**Fig. S63. 13C NMR spectrum of 23 in CDCl3 33**](#_Toc31360749)

[**Fig. S64. 1H NMR spectrum of 24 in C5D5N 34**](#_Toc31360750)

[**Fig. S65. 13C NMR spectrum of 24 in C5D5N 34**](#_Toc31360751)

[**Fig. S66. 1H NMR spectrum of 25 in CDCl3 35**](#_Toc31360752)

[**Fig. S67. 13C NMR spectrum of 25 in CDCl3 35**](#_Toc31360753)

[**Fig. S68. HPLC chromatogram of the acid hydrolysis of 1 36**](#_Toc31360754)

# Structural identification for 3-25

Twenty-three known compounds were identified as (7*S*,8*R*)-4,9′-dihydroxyl-3,3′- dimethoxyl-7,8-dihydrobenzofuran-1′-propylneolignan (**3**) [1], (7*S*,8*R*)-threo-1′-[3′ -hydroxy-7-(4-hydroxy-3-methoxyphenyl)-8-hydroxymethyl-7,8-dihydrobenzofuran]acrylaldehyde (**4**) [2], (2*R*-*trans*)-2,3-dihydro-2-(4-hydroxy-3-methoxyphenyl)-3- (hydroxymethyl)-7-methoxy-5-benzofuranpropanol acetate (**5**) [3], (7*R*,8*S*)-dehydrodiconiferyl alcohol (**6**) [4], (-)-secoisolariciresinol (**7**) [5], (+)-pinoresinol (**8**) [6], (+)-medioresinol (**9**) [7], syringaresinol (**10**) [8], garbanzol (**11**) [9], 7,4ʹ-dihydroxy-5,3ʹ-dimethoxyflavanonol (**12**) [10], 4′-*O*-methyldihydroquercetin (**13**) [10], (+)-aromadendrin (**14**) [11], (-)-eriodictyol (**15**) [12], 5-hydroxy-7-methoxyflavanone (**16**) [13], quercetin (**17**) [29], scopoletin (**18**) [14], 3-formylindole (**19**) [15], indazole (**20**) [16], isovanillic acid (**21**) [17], friedelin (**22**) [18], lupenone (**23**) [19], betulin (**24**) [19], sitosterol (**25**) [20] respectively, by comparing their spectroscopic and physical data with those of related literatures.

**Fig. S1.** The chemical structures of **3**-**25**.

**References**

1. X.G. Tong, and Y.X. Cheng, *Nat. Prod. Res. Dev.* **23**, 404 (2011).
2. S.J. Zhang, Y.Y. Huang, Y. Li, Y.H. Wang, and X.J. He, *Food Chem.***286**, 421 (2019).
3. T. Popoff, and O. Theander, *Phytochemistry* **14**, 2065 (1975).
4. M.S.M. Yuen, F. Xue, T.C.W. Mak, and H.N.C. Wong, *Tetrahedron* **54**, 12429 (1998).
5. H.B. Park, K.H. Lee, K.H. Kim, I.K. Lee, H.J. Noh, S.U. Choi, and K.R. Lee, *Nat. Prod. Sci.* **15**, 17 (2009).
6. N. Bai, K. He, M. Roller, C.S. Lai, L. Bai, and M.H. Pan, *J. Agric. Food Chem.* **63**, 2458 (2015).
7. H.L. Ji, M. Sai, S.Y. Zhou, L.Q. Deng, H. Wang, H. Quan, M. Chen, and X.Z. Lan, *Acta Pharm. Sin.* **53**, 97 (2018).
8. H.L. Ji, M. Sai, S.Y. Zhou, L.Q Deng, H. Wang, H. Quan, M. Chen, X.Z. Lan, *Acta Pharm.Sin.* **53**, 97 (2018).
9. K. Saejueng, and N. Panthama, *Nat. Prod. Res.* **29**, 1177 (2015).
10. N. Zhang, X.Y. Wei, and L.D. Lin, *J. Trop. Subtrop. Bot.* **22**, 96 (2014).
11. Y.X. Shen, H.L. Teng, G.Z. Yang, Z.N. Mei, and X.L. Chen, *Nat. Prod. Res.* **45**, 1139 (2010).
12. G.M.V. Júnior, C.M. Sousa, A.J. Cavalheiro, J.H.G. Lago, and M.H. Chaves, *Helv. Chim. Acta* **91**, 2159 (2010).
13. M. Bai, C.J. Zheng, L.J. Wu, S.Y. Wu, Y. Cai, G.Y. Chen, C.R. Han, and X.P. Song, *Chem. Nat. Compd.* 54, 350 (2018).
14. S.A.L. Bayoumi, M.G. Rowan, J.R. Beeching, and I.S. Blagbrough, *Phytochemistry* **71**, 598 (2010).
15. S. Martínez-Luis, J.F. Gómez, C. Spadafora, H.M. Guzmán, and M. Gutiérrez, *Molecules* **17**, 11146 (2012).
16. E. Dubost, S. Stiebing, T. Ferrary, T. Cailly, F. Fabis, and V. Collot, *Tetrahedron* **70**, 8413 (2014).
17. L.L. Ge, H.Q. Wan, S.M. Tang, H.X. Chen, J.M. Li, K.D. Zhang, B.P. Zhou, J. Fei, S.P. Wu, and X.B. Zeng, *RSC Adv.* **8**, 35374 (2018).
18. J. Chen, S.L. Wei, and K. Gao, *Chem. Nat. Compd.* **51**, 592 (2015).
19. H. Yamashita, M. Matsuzaki, Y. Kurokawa, T. Nakane, M. Goto, K.H. Lee, T. Shibata, H. Bando, and K. Wada, *Phytochem. Lett.***31**, 140 (2019).
20. A.A. Al-Fadhli, and J.A. Nasser, *Asian J. Chem.***26**, 8019 (2014).


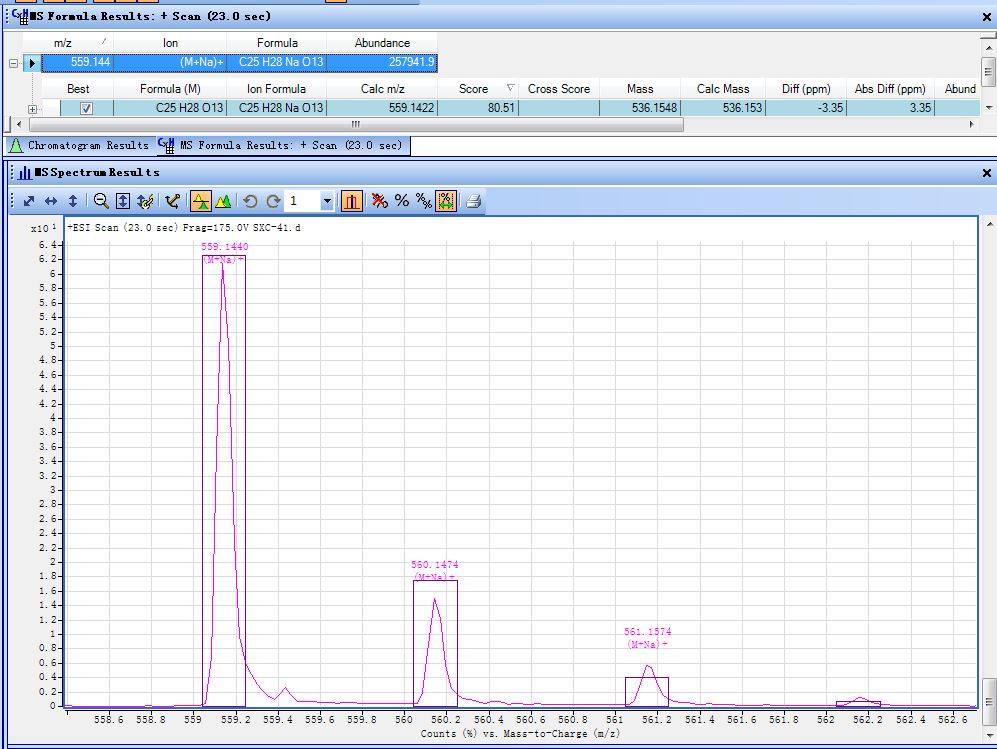


# Fig. S2. HRESIMS of 1


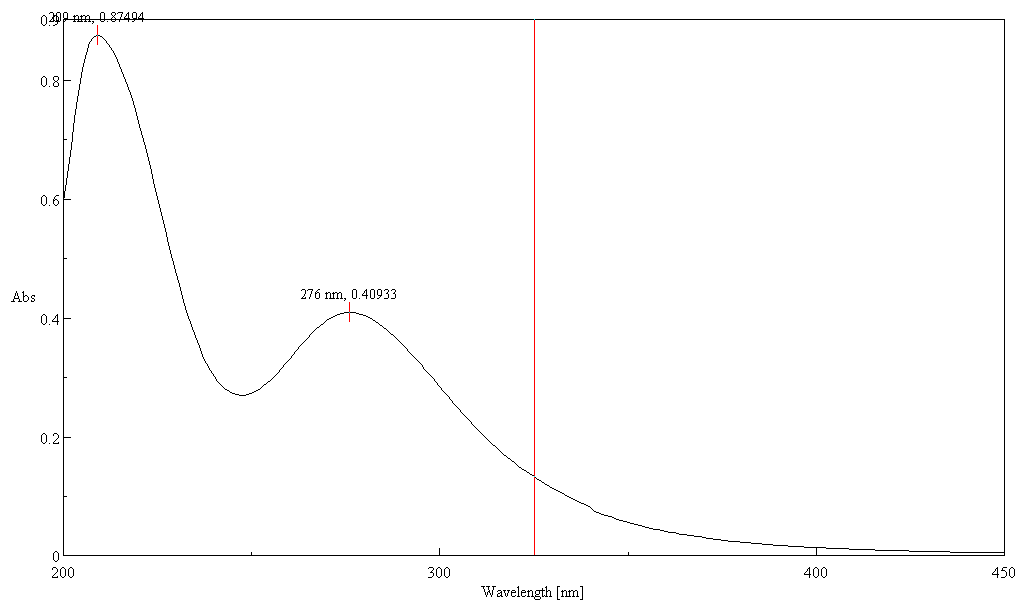


# Fig. S3. UV spectrum of 1 (CH3OH)


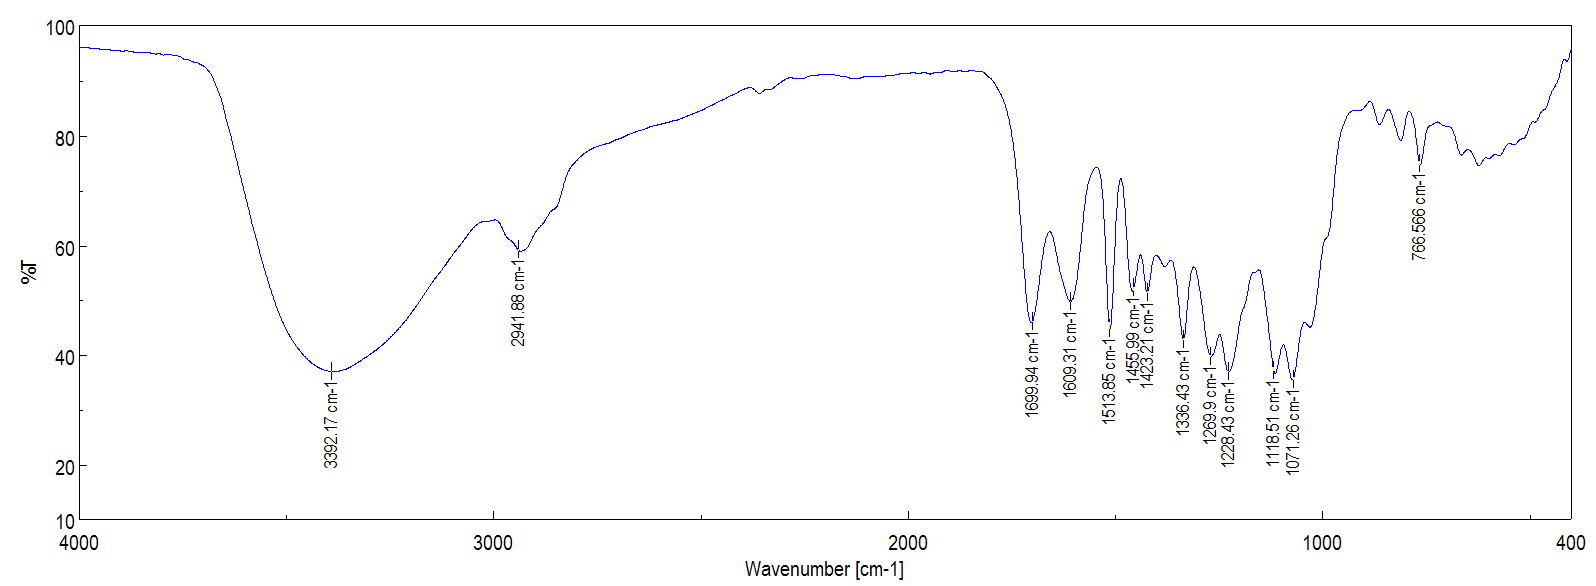


# Fig. S4. IR spectrum of 1 (KBr disc)


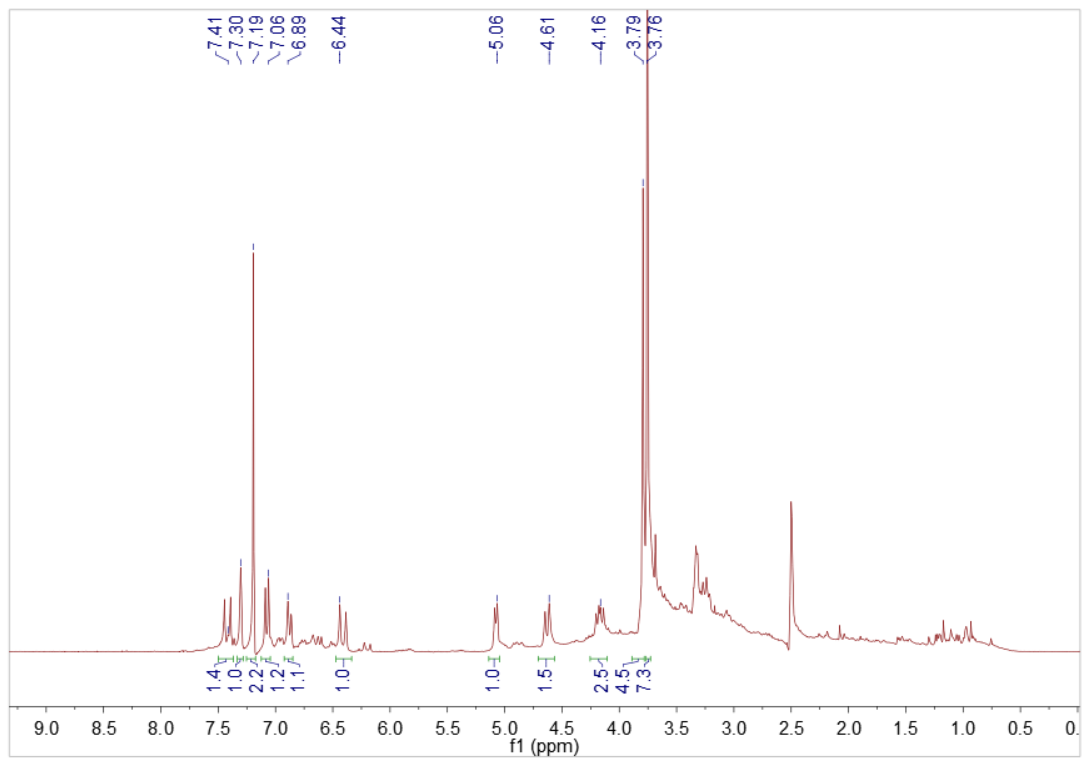


# Fig. S5. 1H NMR spectrum of 1 in DMSO


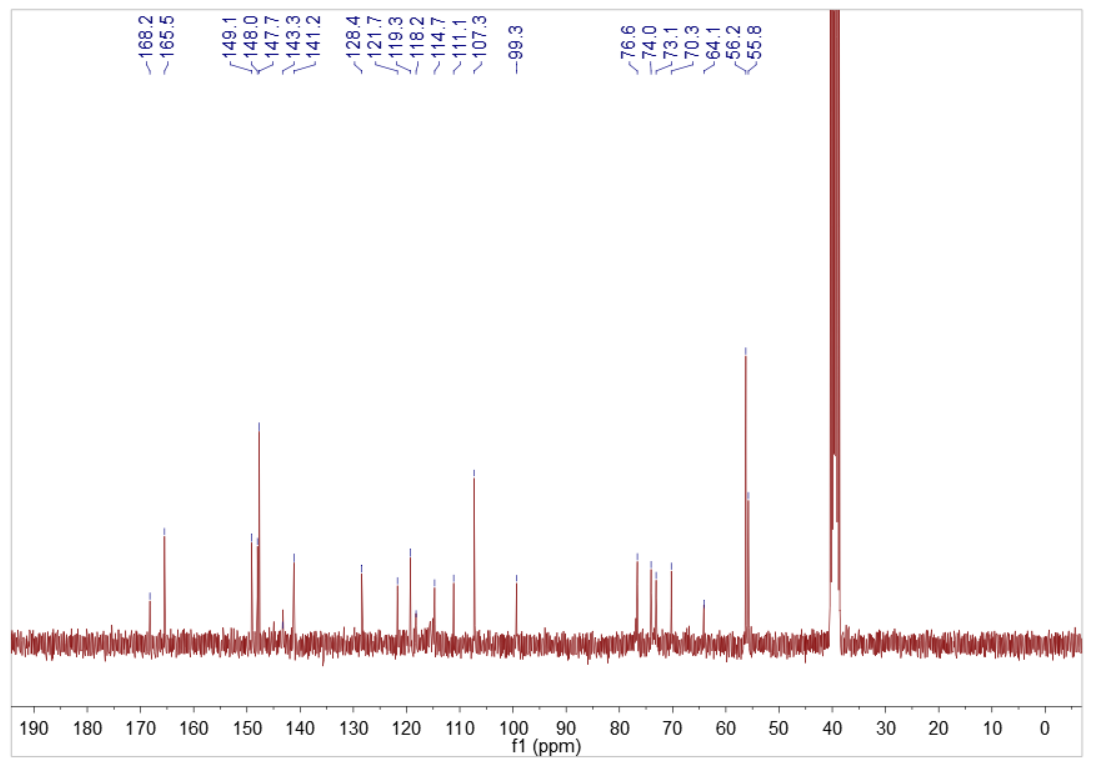


# Fig. S6. 13C NMR spectrum of 1 in DMSO


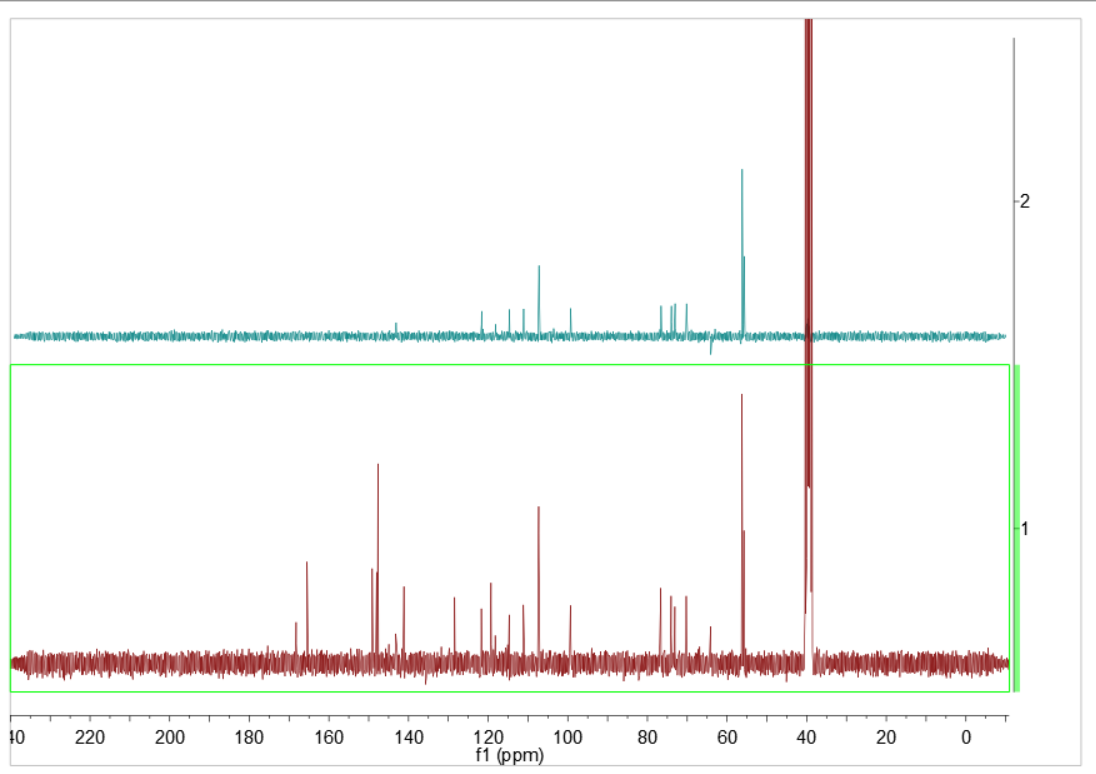


# Fig. S7. DEPT-135 spectrum of 1 in DMSO


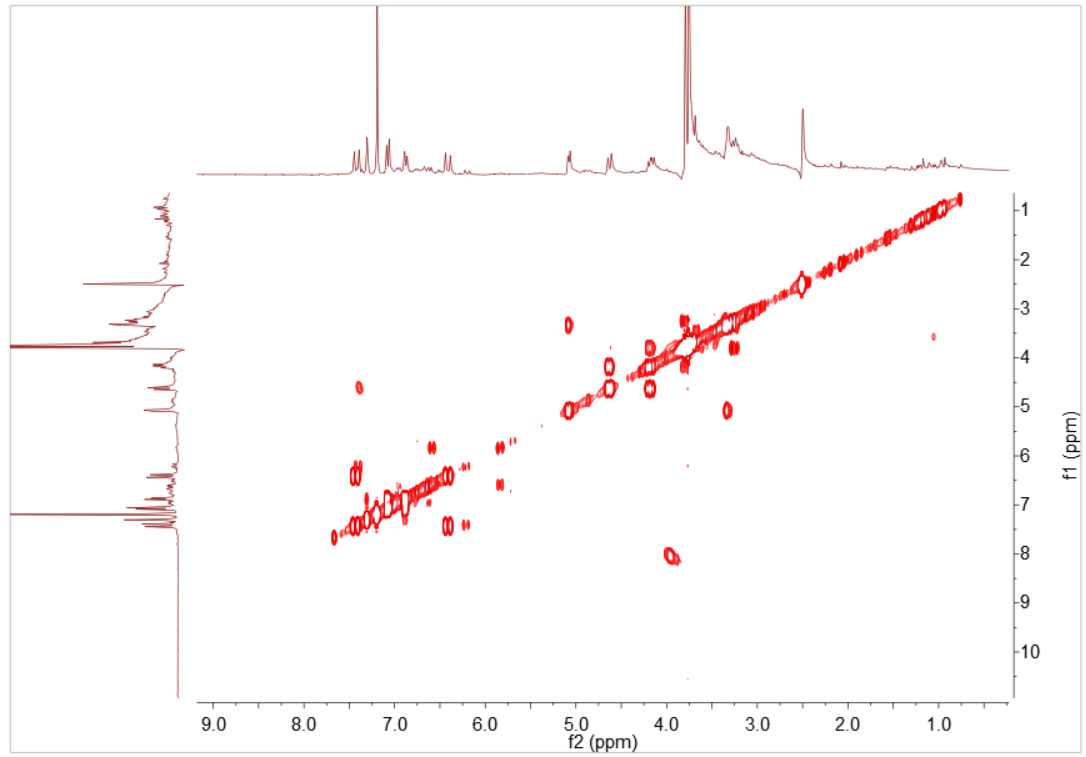


# Fig. S8. 1H-1H COSY spectrum of 1 in DMSO


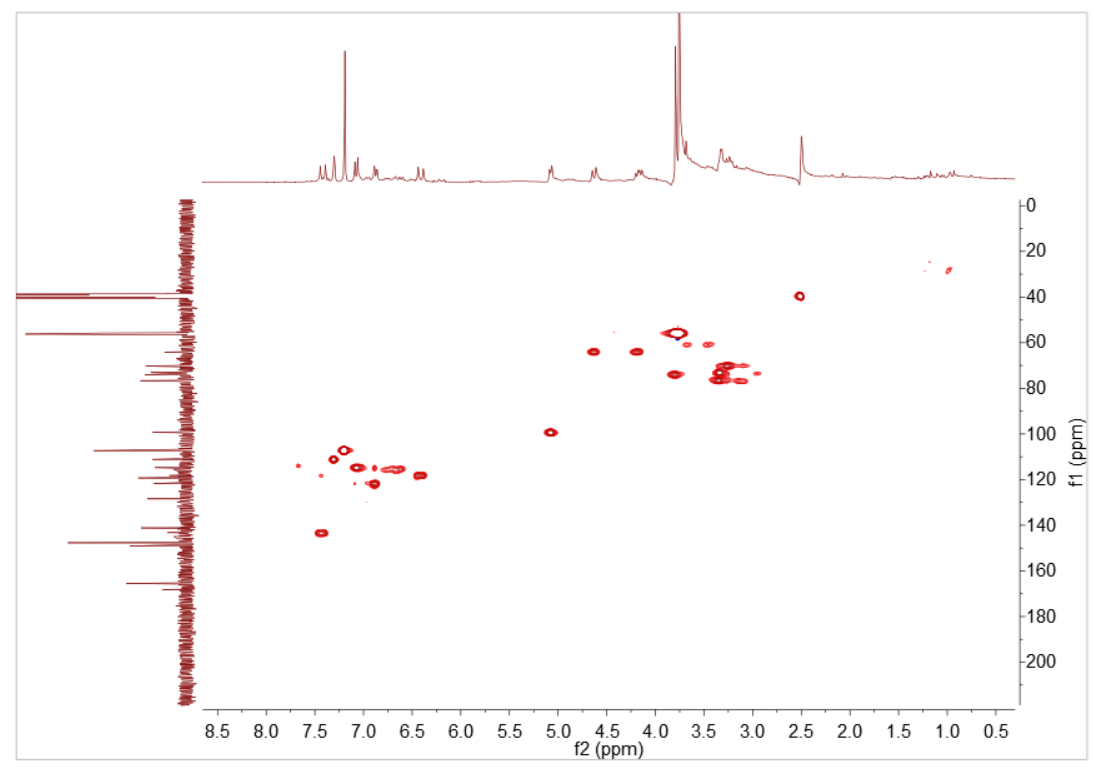


# Fig. S9. HSQC spectrum of 1 in DMSO


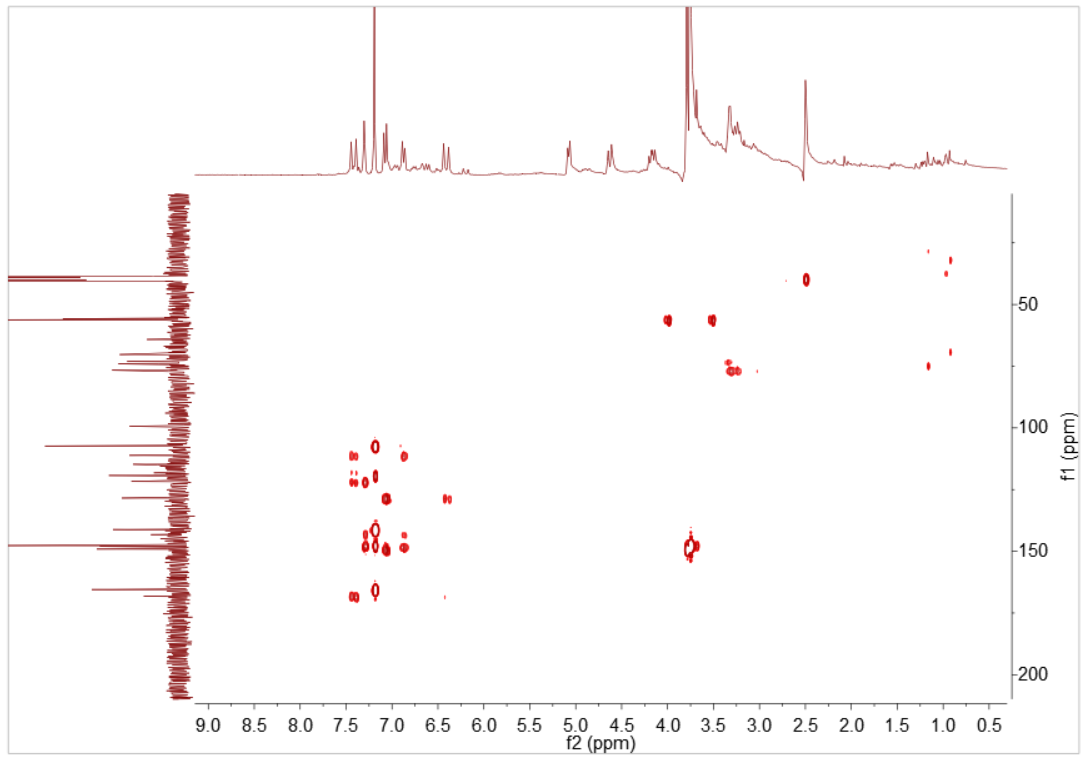


# Fig. S10. HMBC spectrum of 1 in DMSO


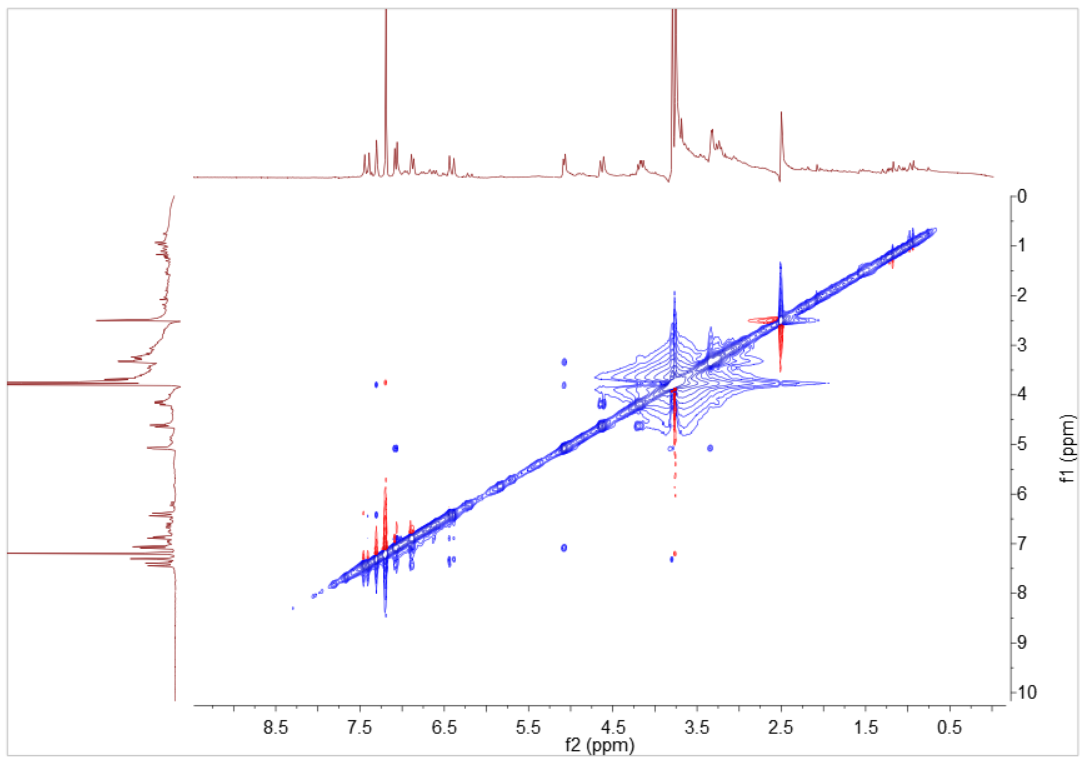


# Fig. S11. NOESY spectrum of 1 in DMSO


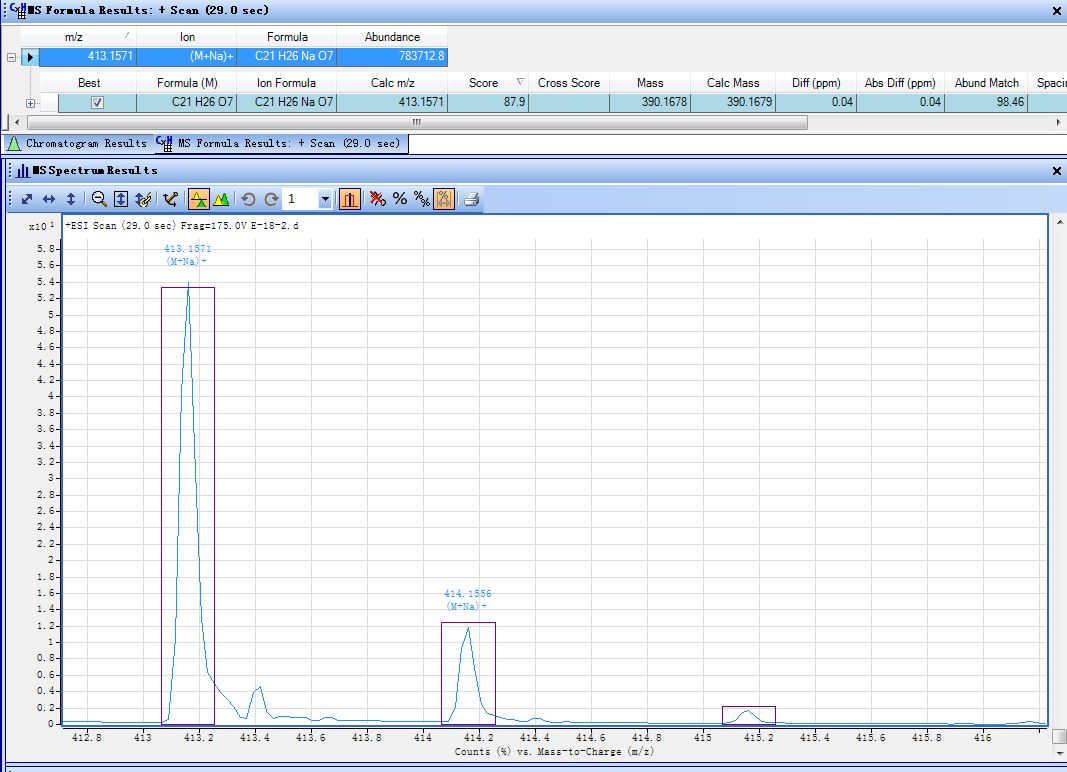


# Fig. S12. HRESIMS of 2


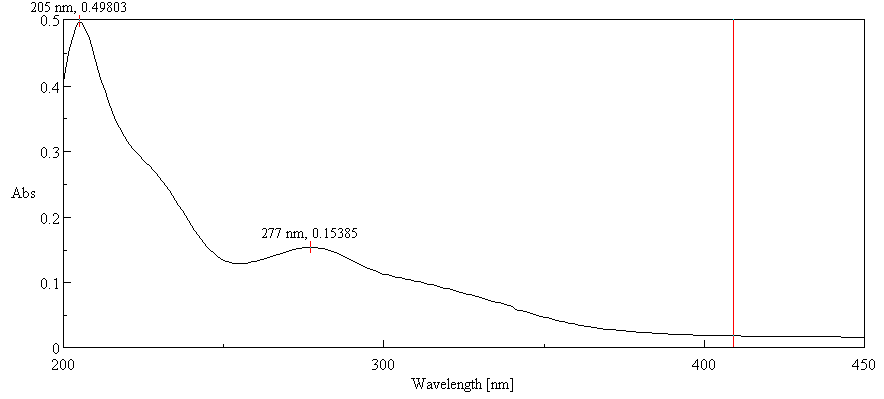


# Fig. S13. UV spectrum of 2 (CH3OH)


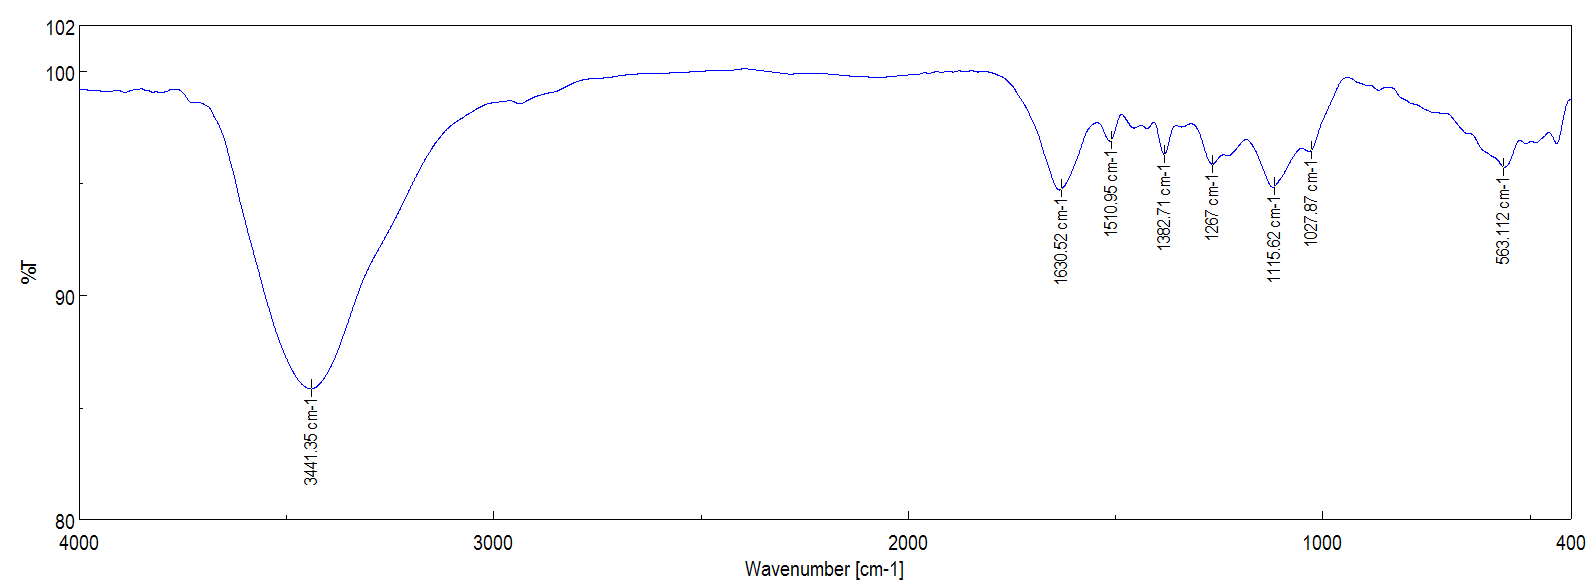


# Fig. S14. IR spectrum of 2 (KBr disc)


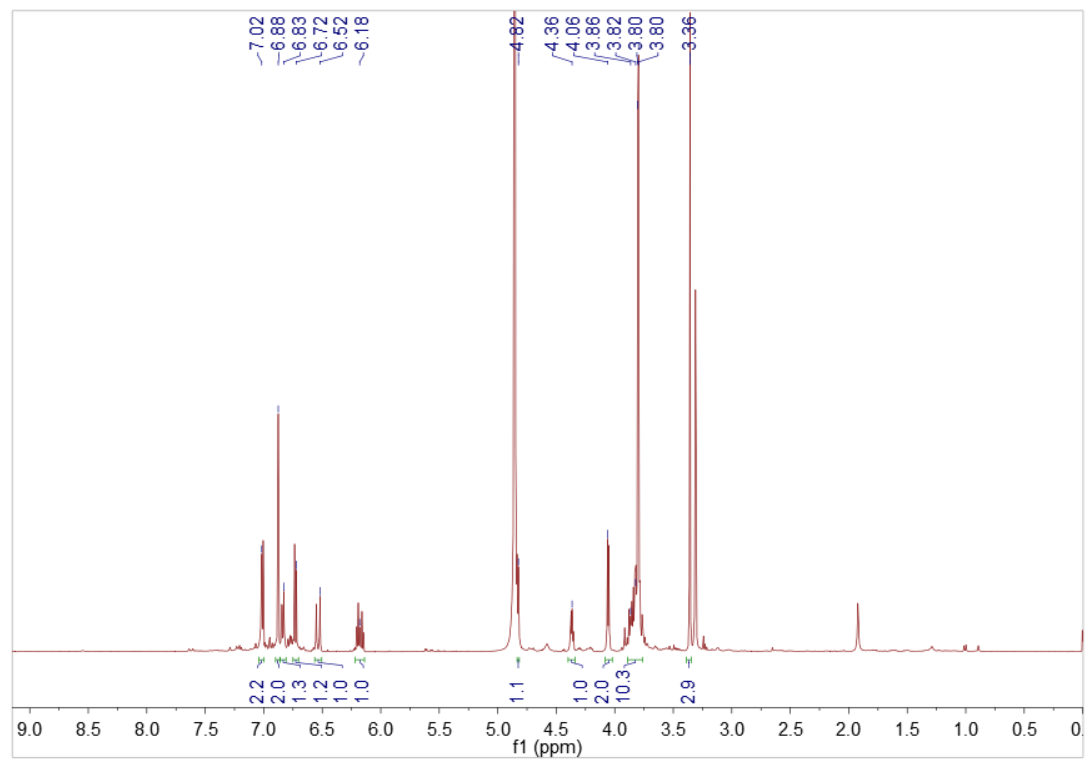


# Fig. S15. 1H NMR spectrum of 2 in CD3OD


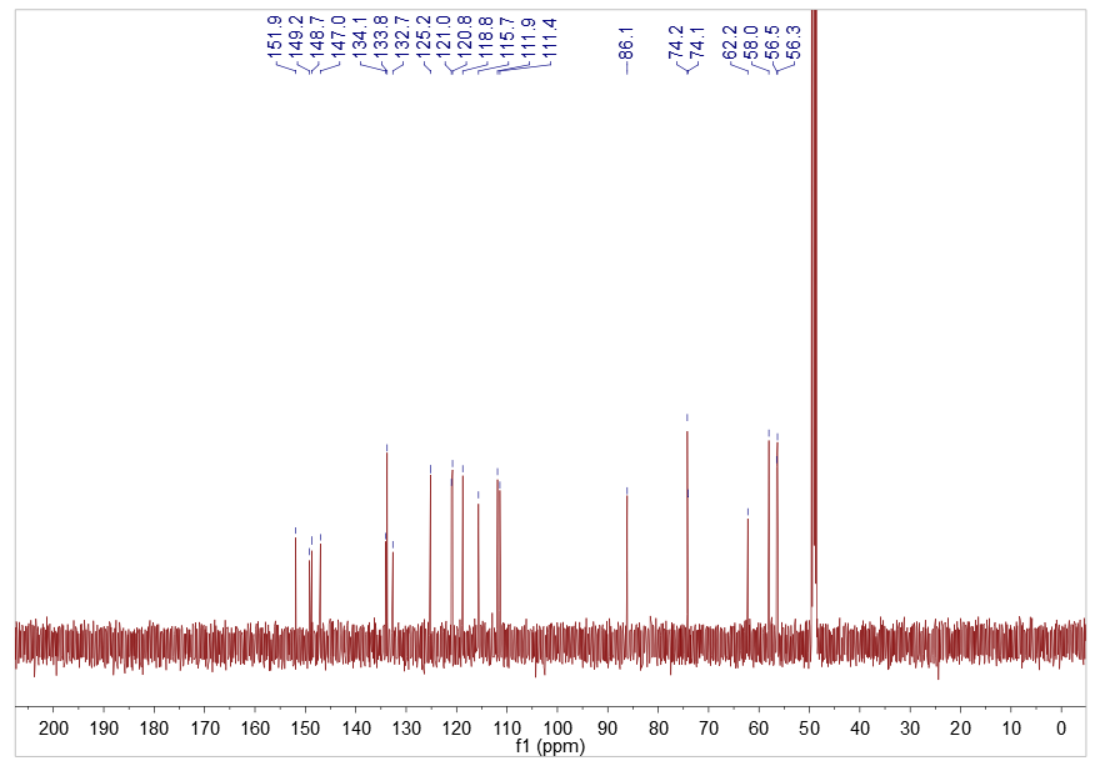


# Fig. S16. 13C NMR spectrum of 2 in CD3OD


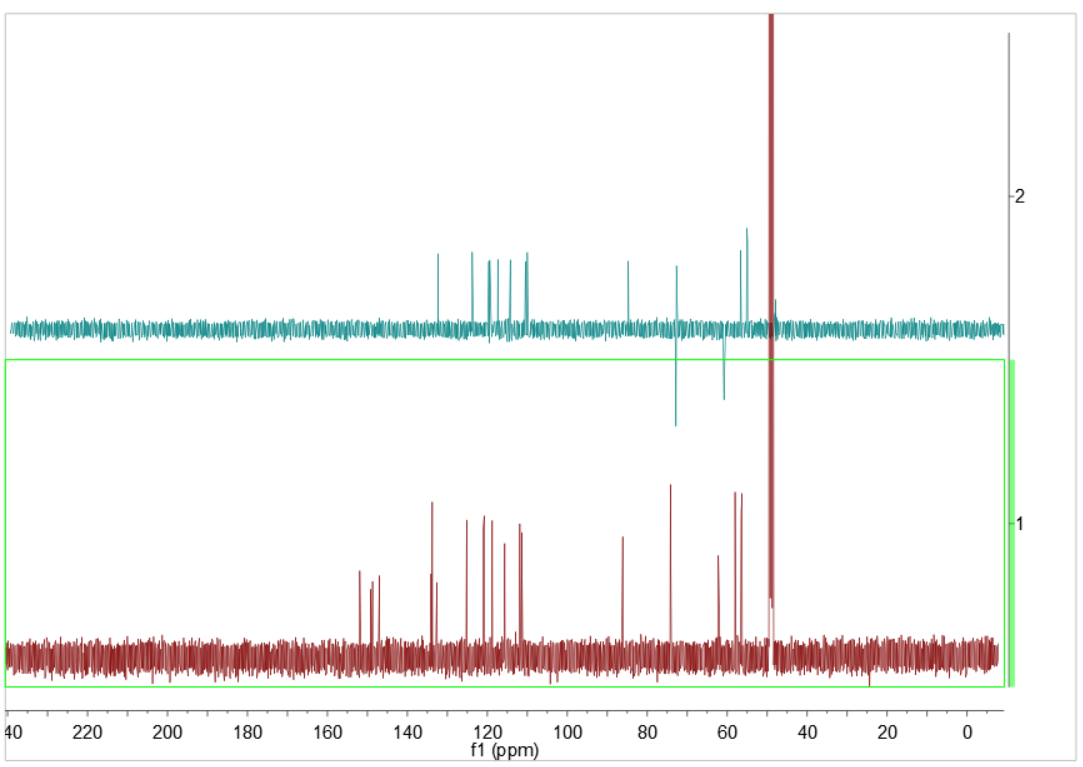


# Fig. S17. DEPT-135 spectrum of 2 in CD3OD


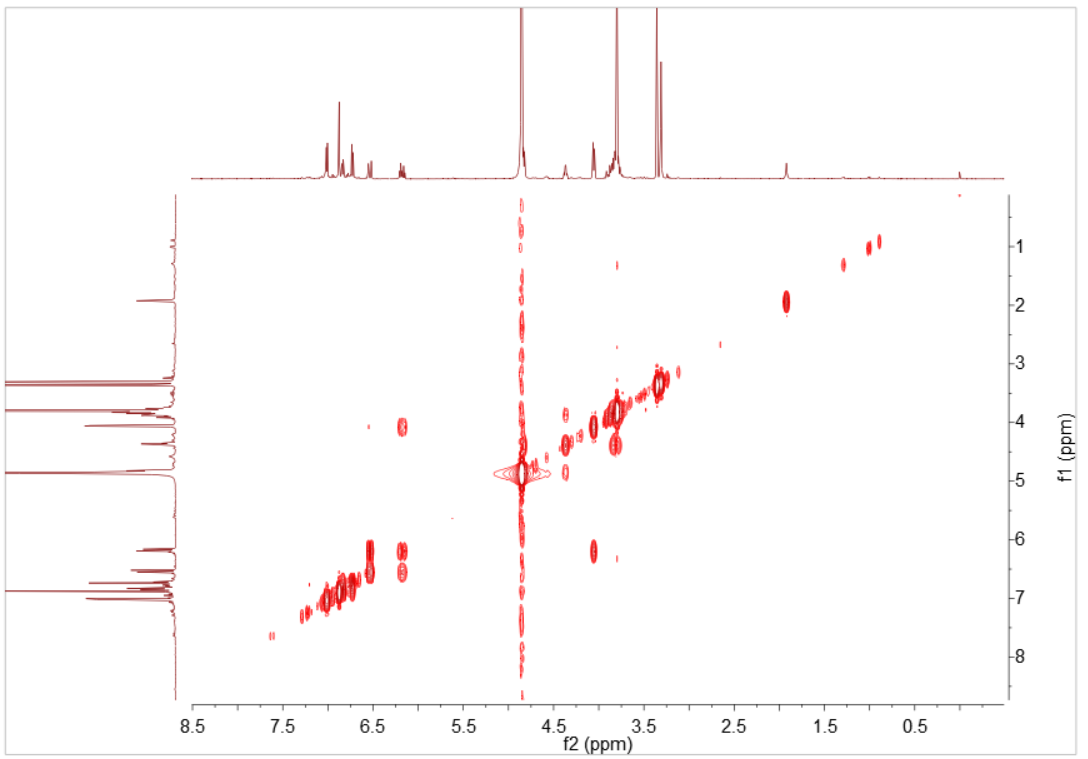


# Fig. S18. 1H-1H COSY spectrum of 2 in CD3OD


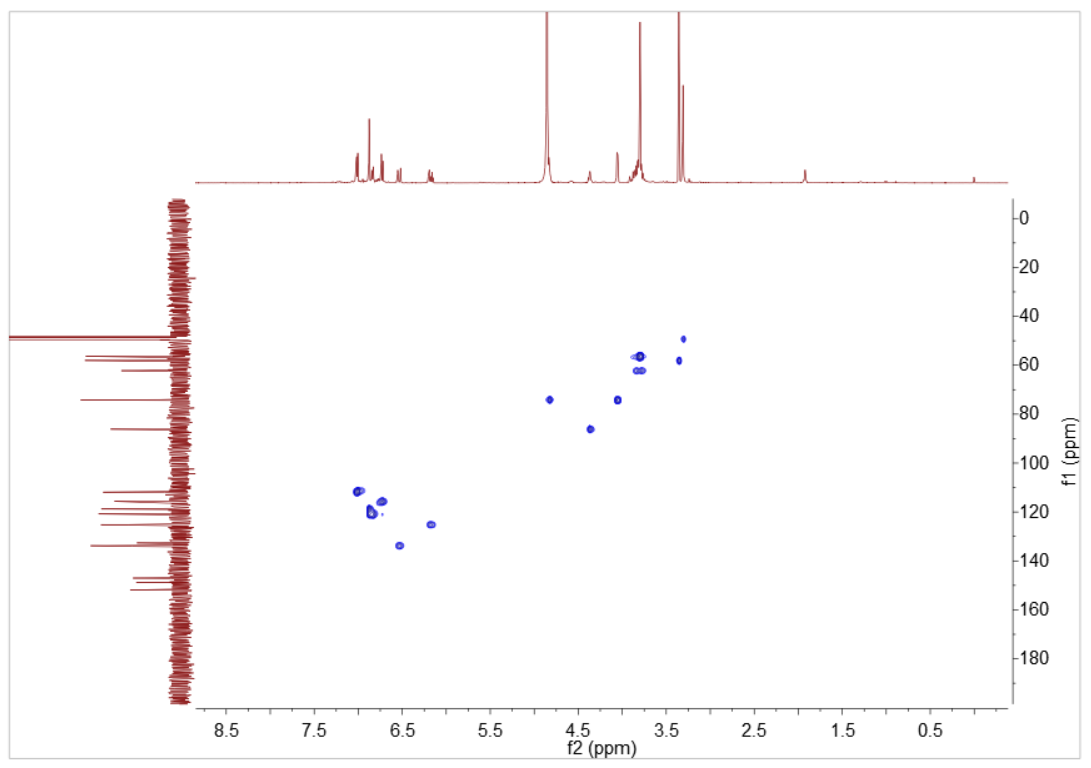


# Fig. S19. HSQC spectrum of 2 in CD3OD


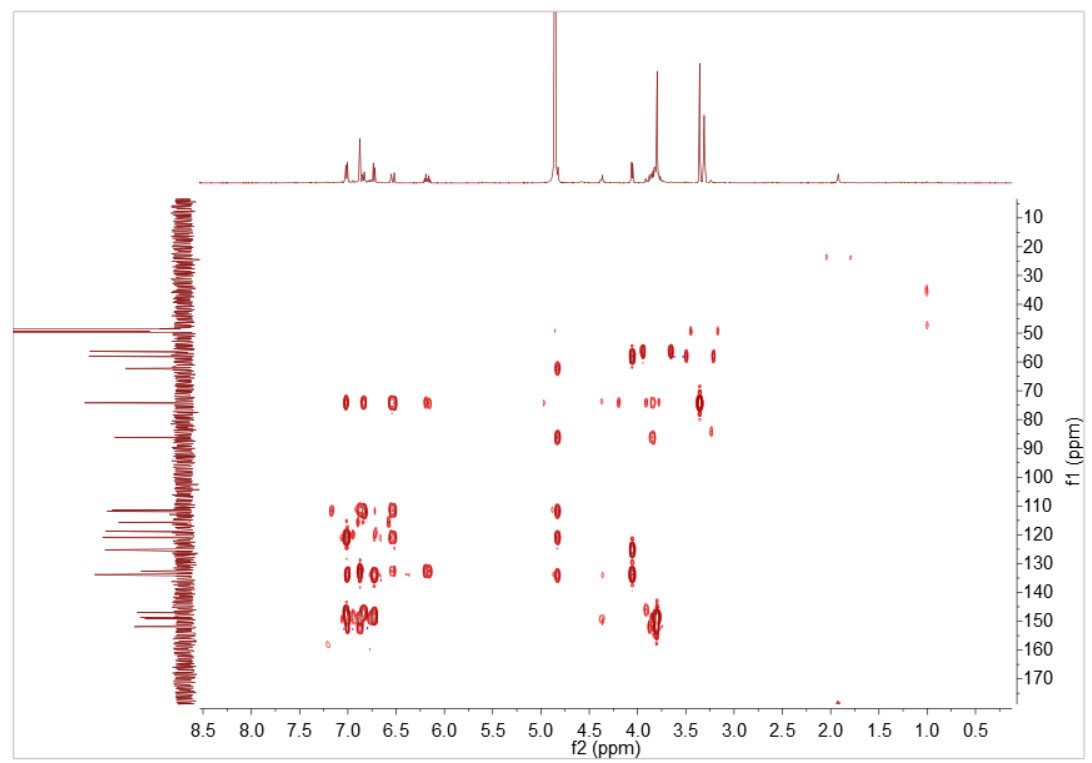


# Fig. S20. HMBC spectrum of 2 in CD3OD


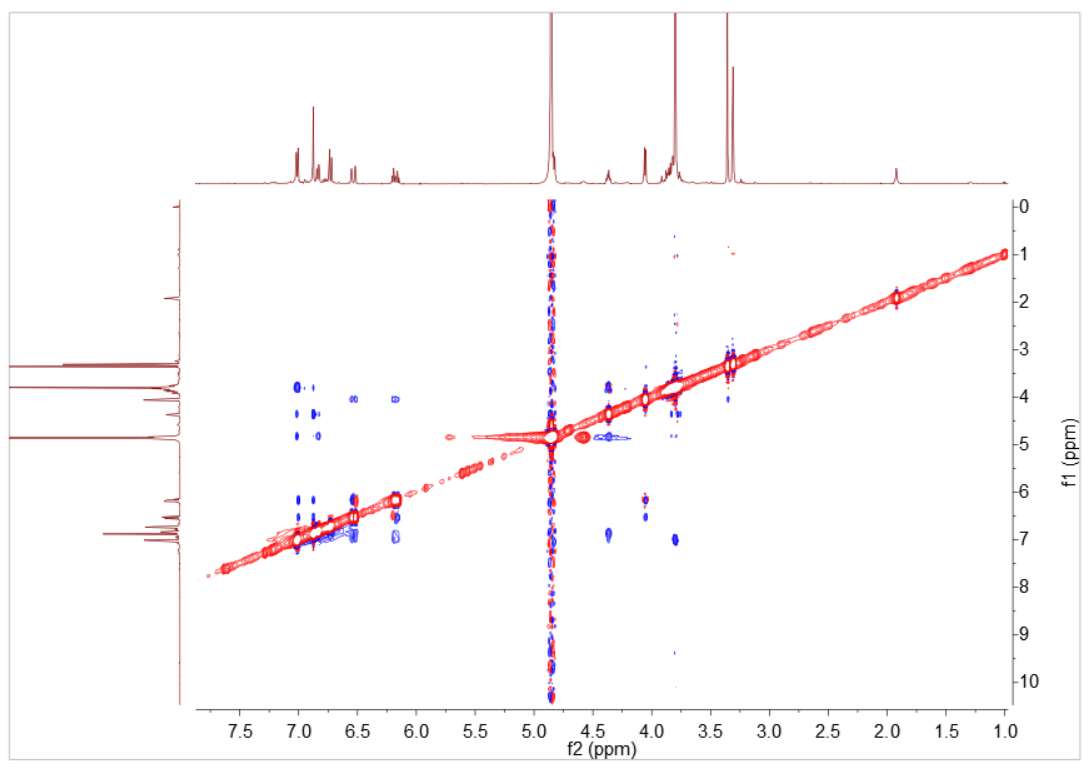


# Fig. S21. NOESY spectrum of 2 in CD3OD


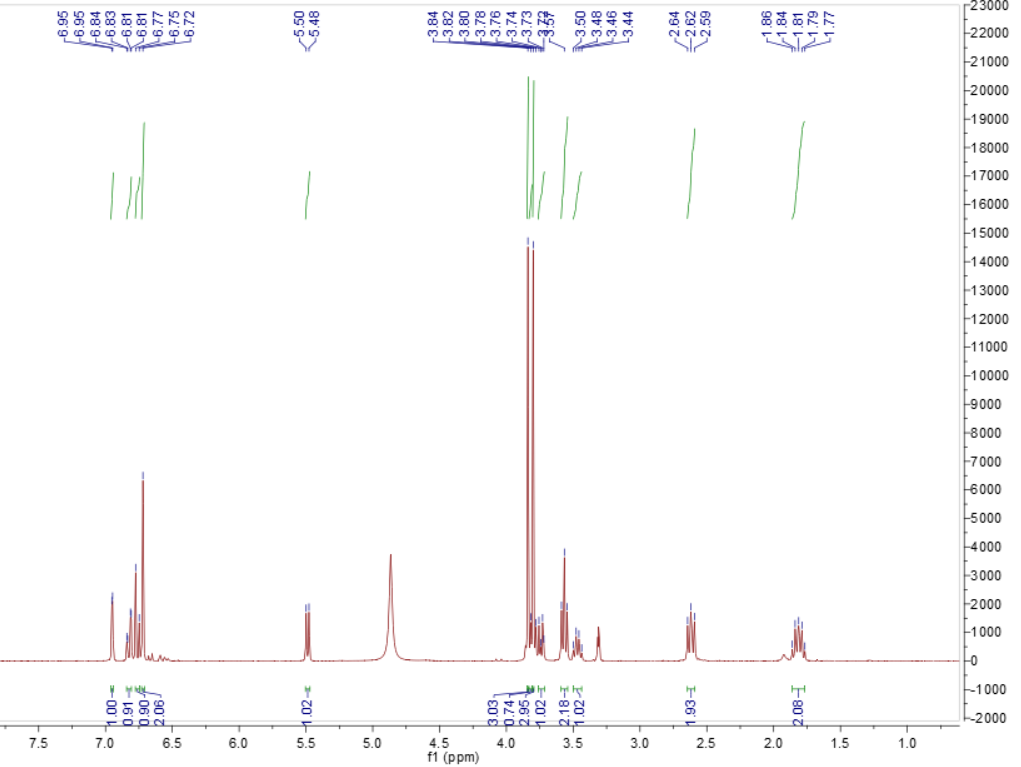


# Fig. S22. 1H NMR spectrum of 3 in CD3OD


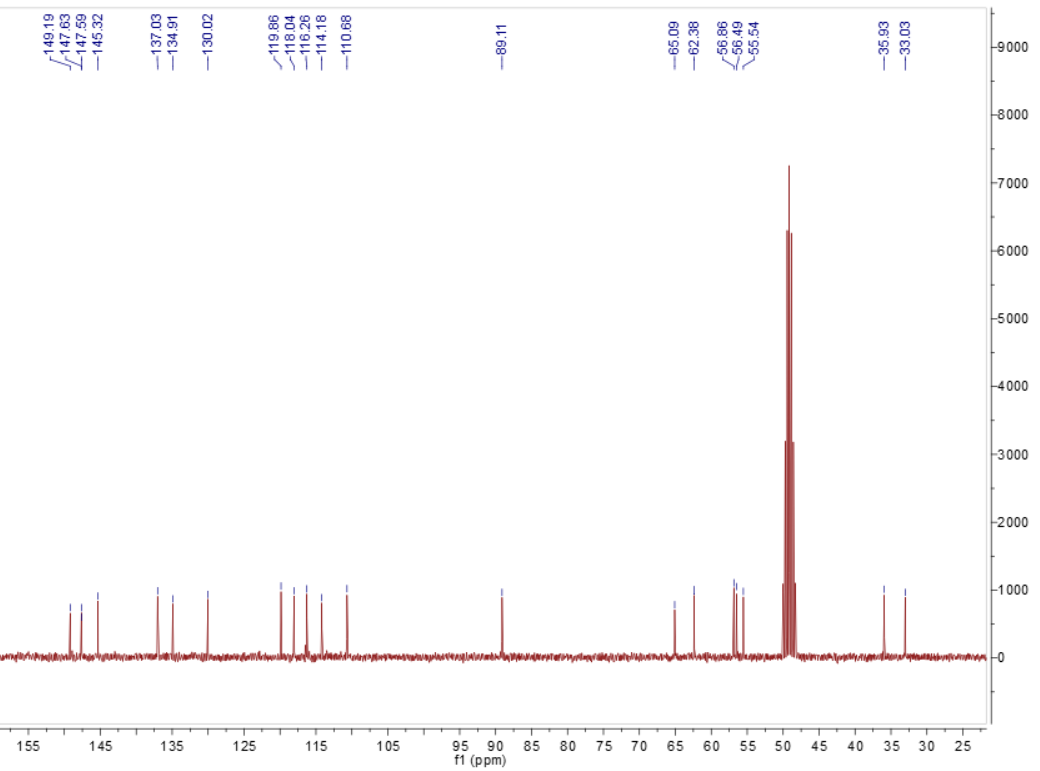


# Fig. S23. 13C NMR spectrum of 3 in CD3OD


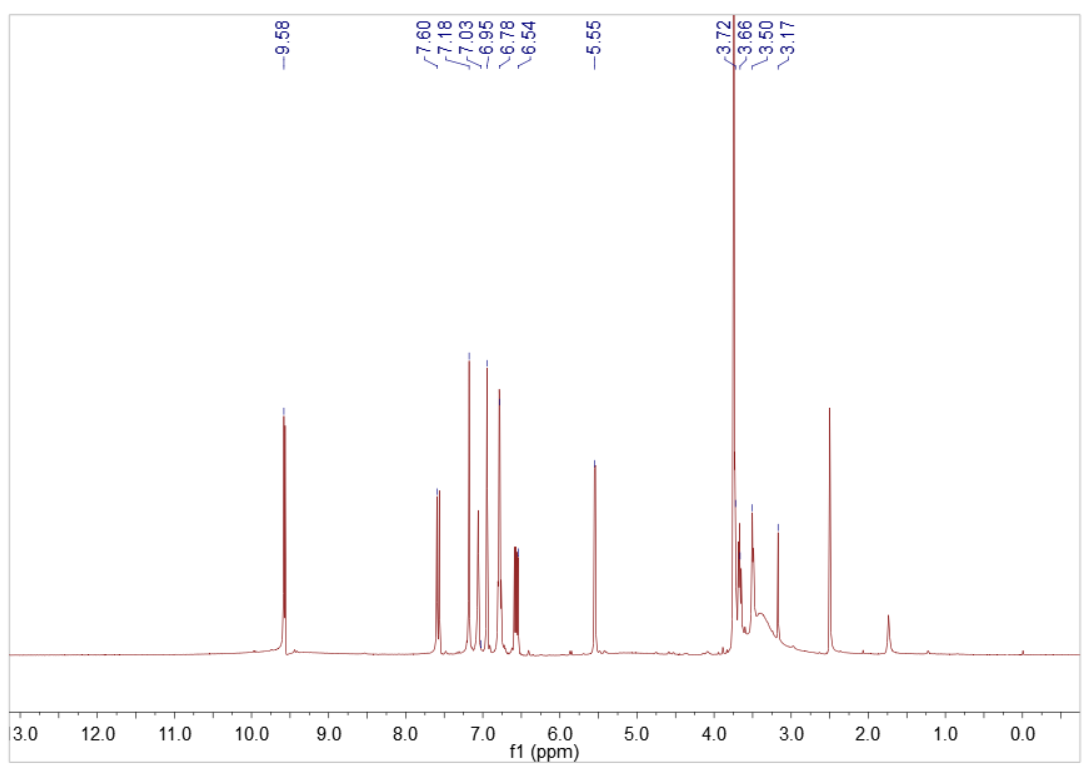


# Fig. S24. 1H NMR spectrum of 4 in DMSO


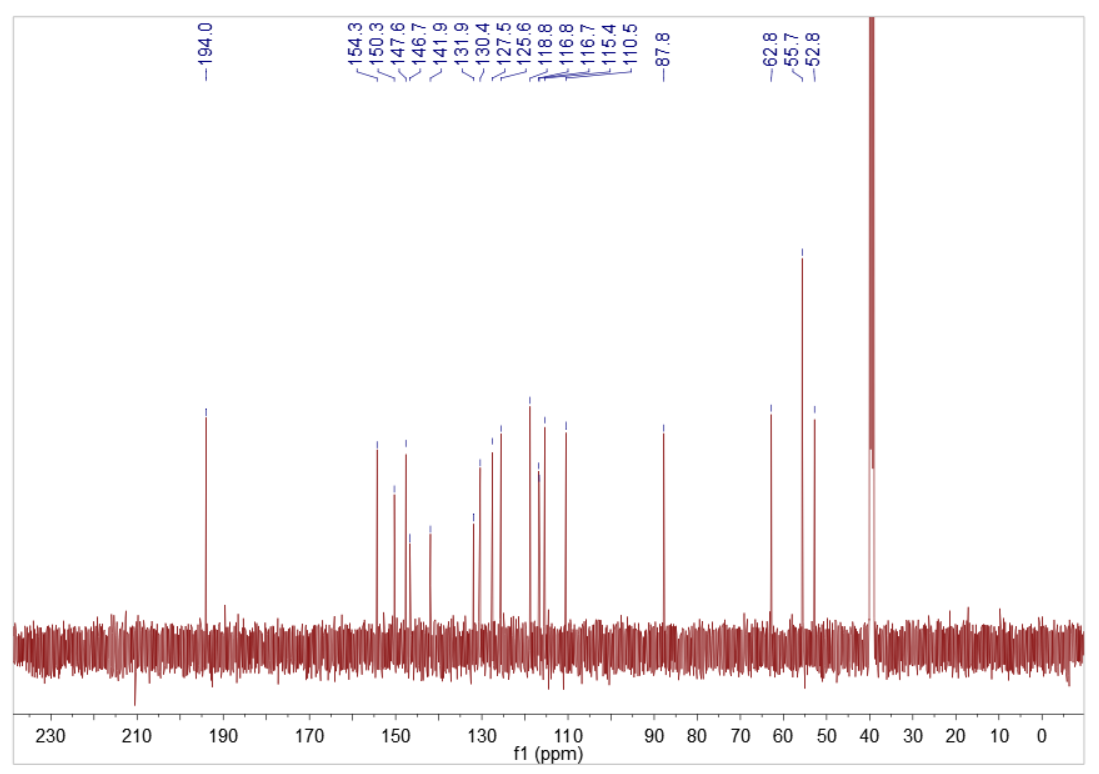


# Fig. S25. 13C NMR spectrum of 4 in DMSO


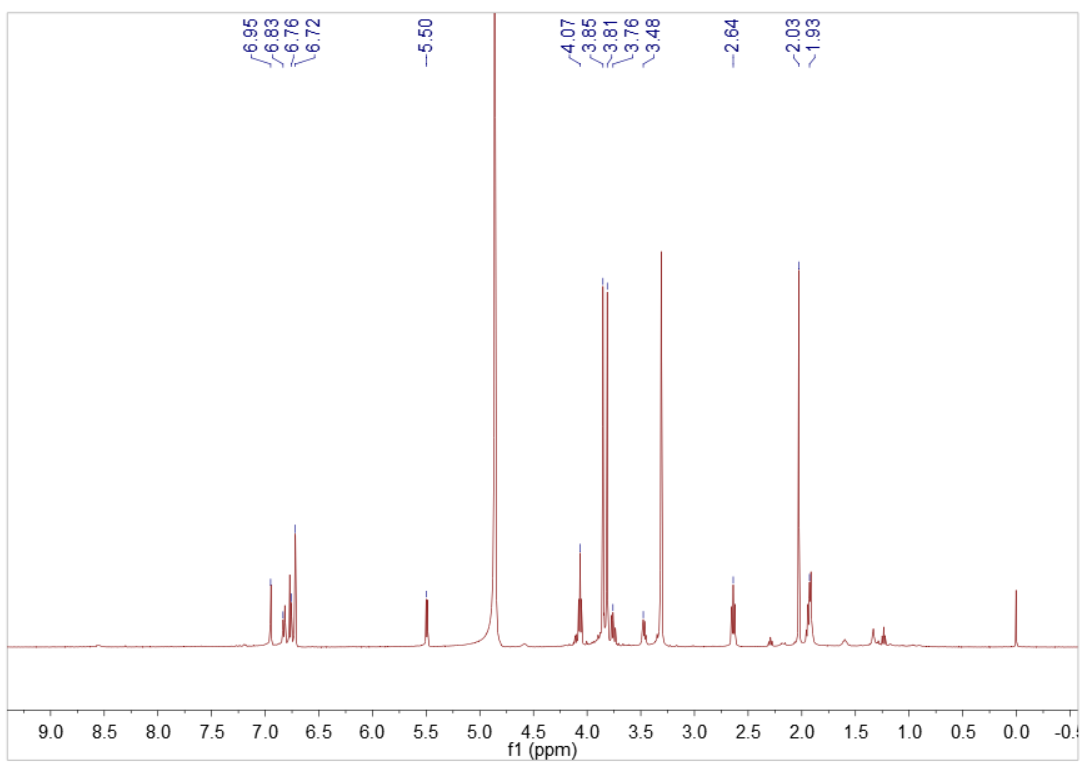


# Fig. S26. 1H NMR spectrum of 5 in CD3OD


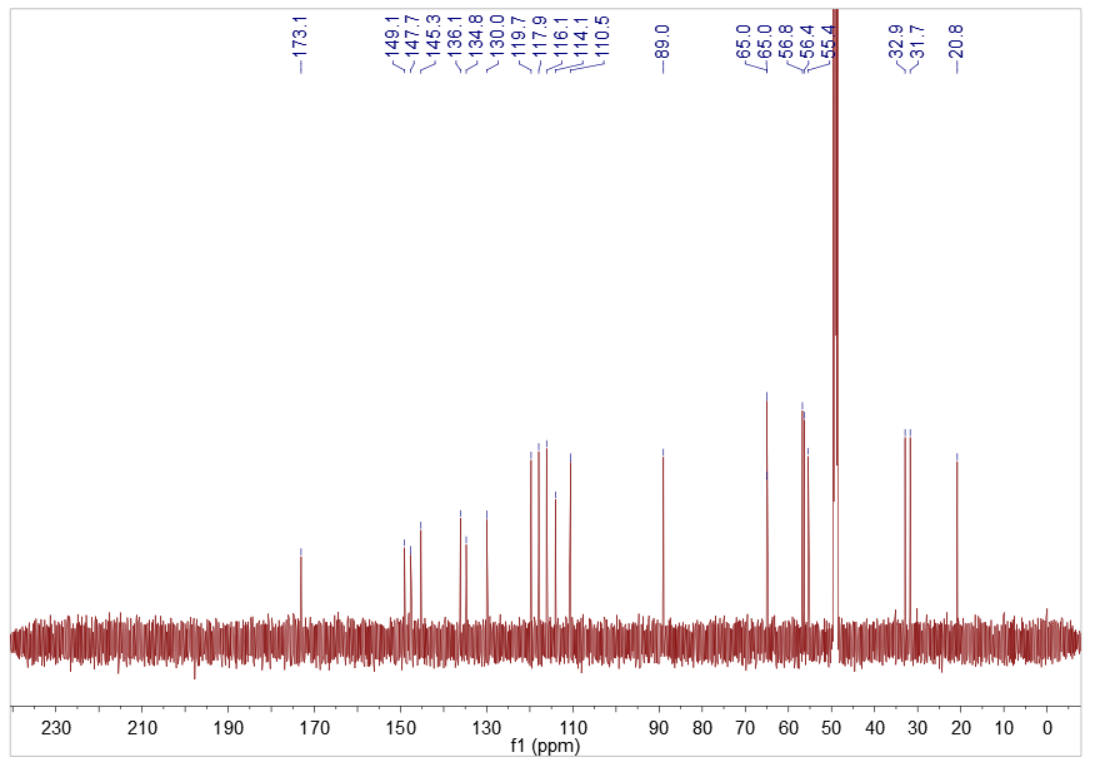


# Fig. S27. 13C NMR spectrum of 5 in CD3OD


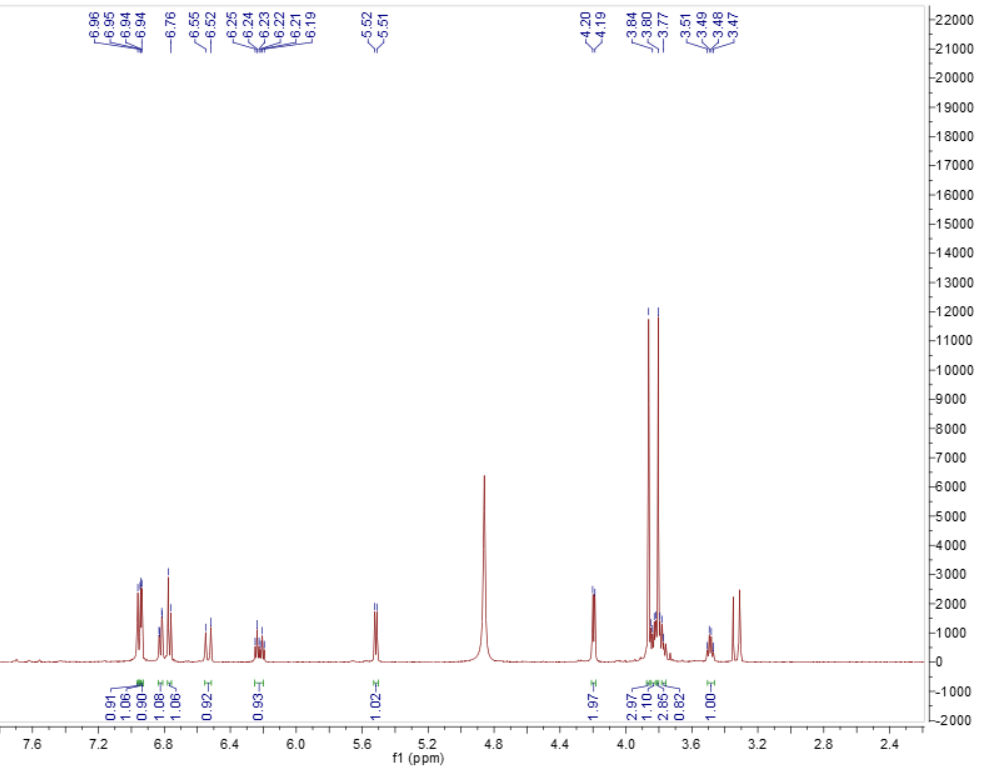


# Fig. S28. 1H NMR spectrum of 6 in CD3OD


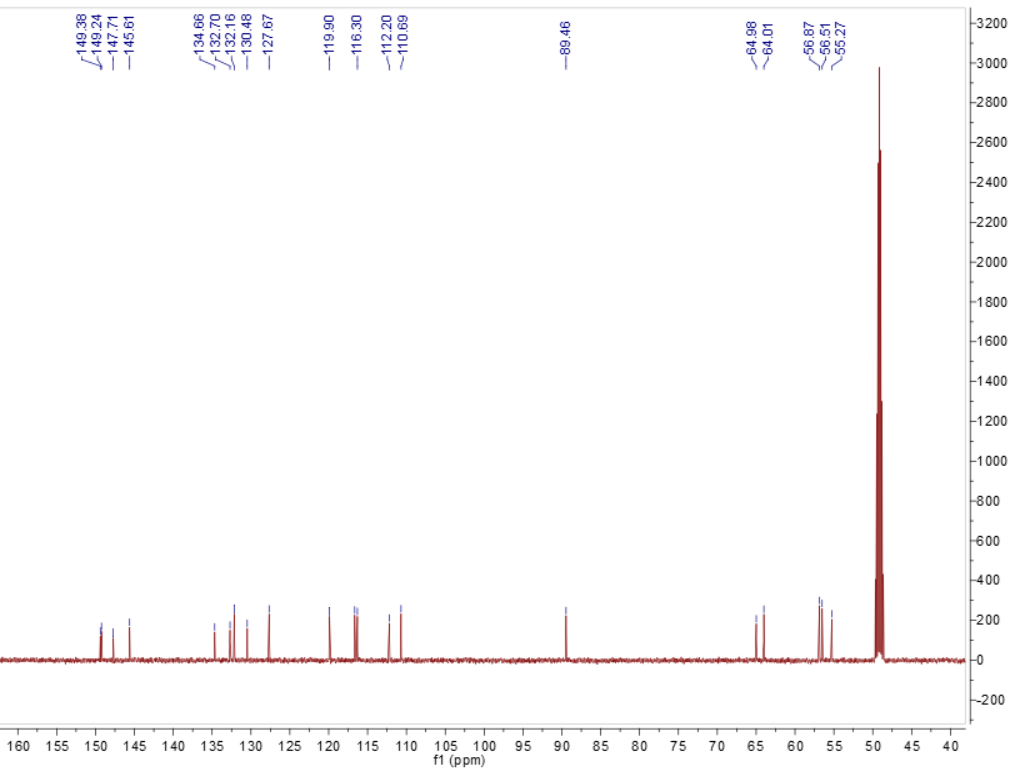


# Fig. S29. 13C NMR spectrum of 6 in CD3OD


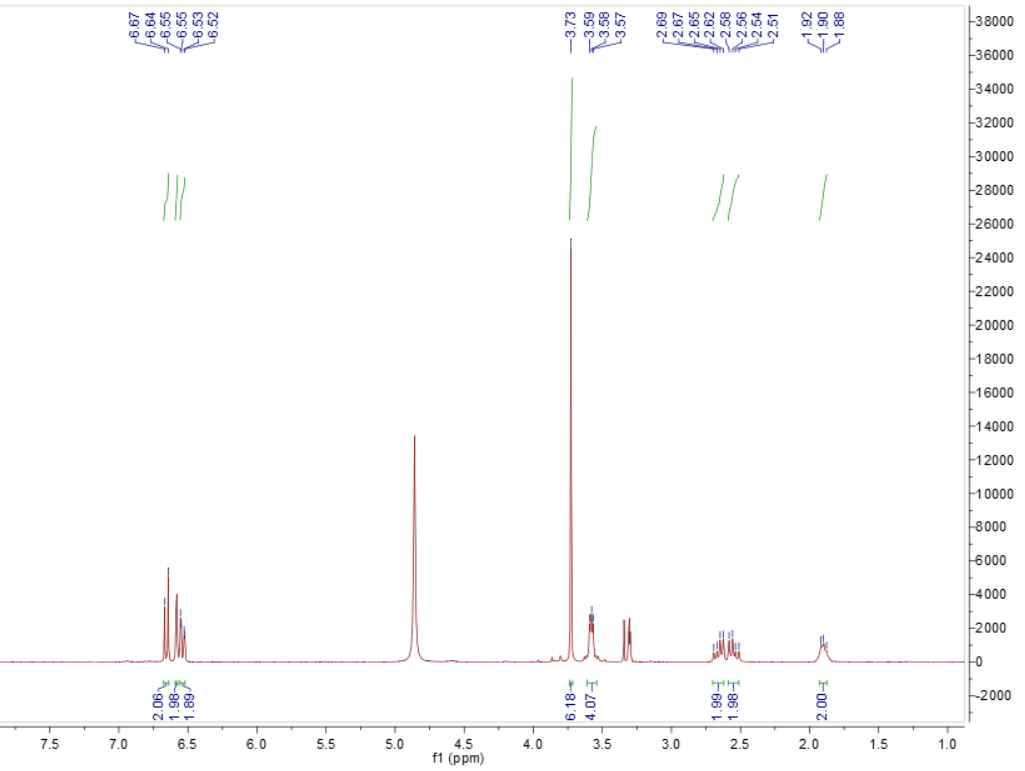


# Fig. S30. 1H NMR spectrum of 7 in CD3OD


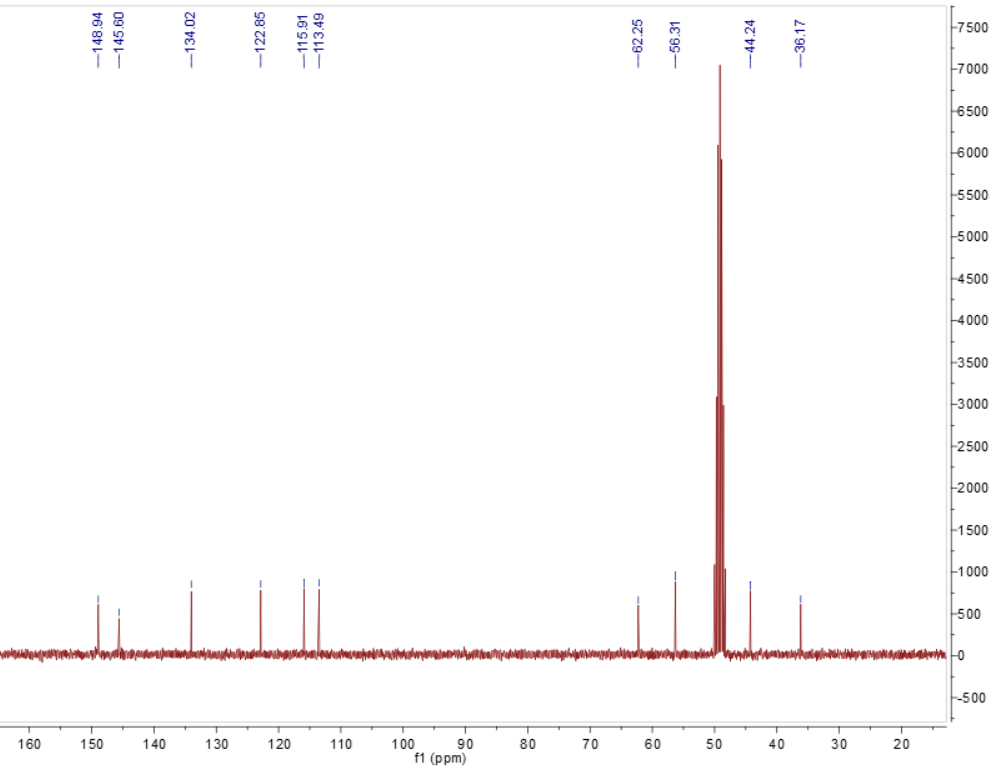


# Fig. S31. 13C NMR spectrum of 7 in CD3OD


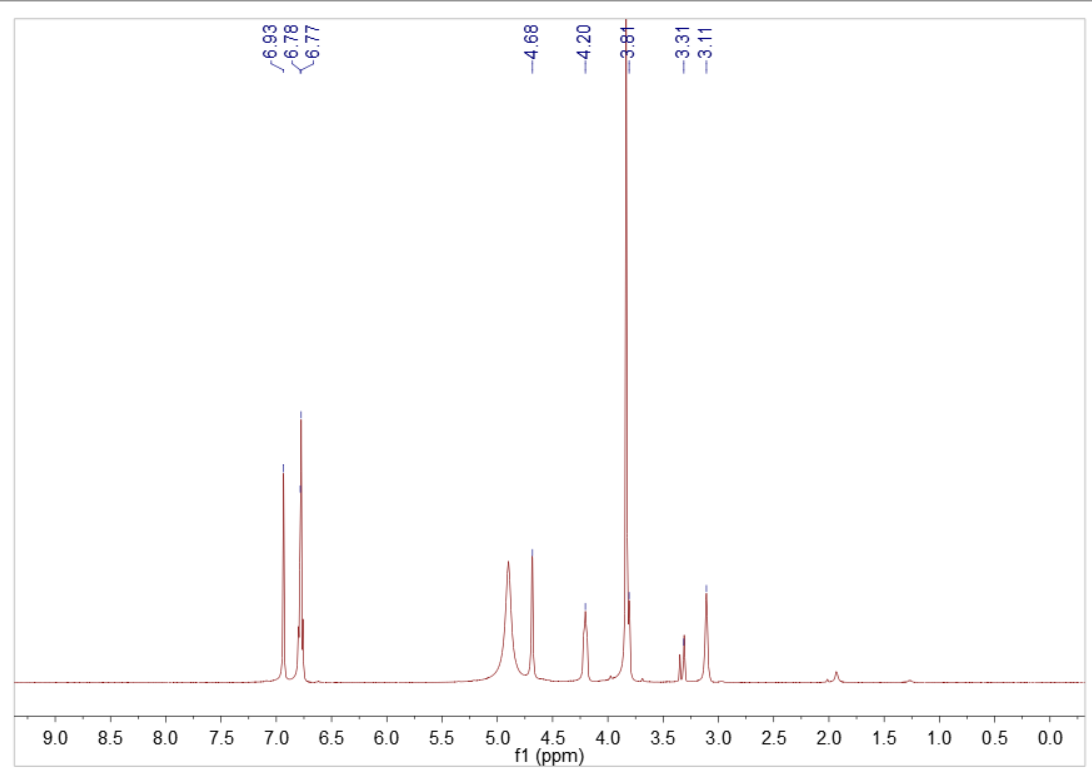


# Fig. S32. 1H NMR spectrum of 8 in CD3OD


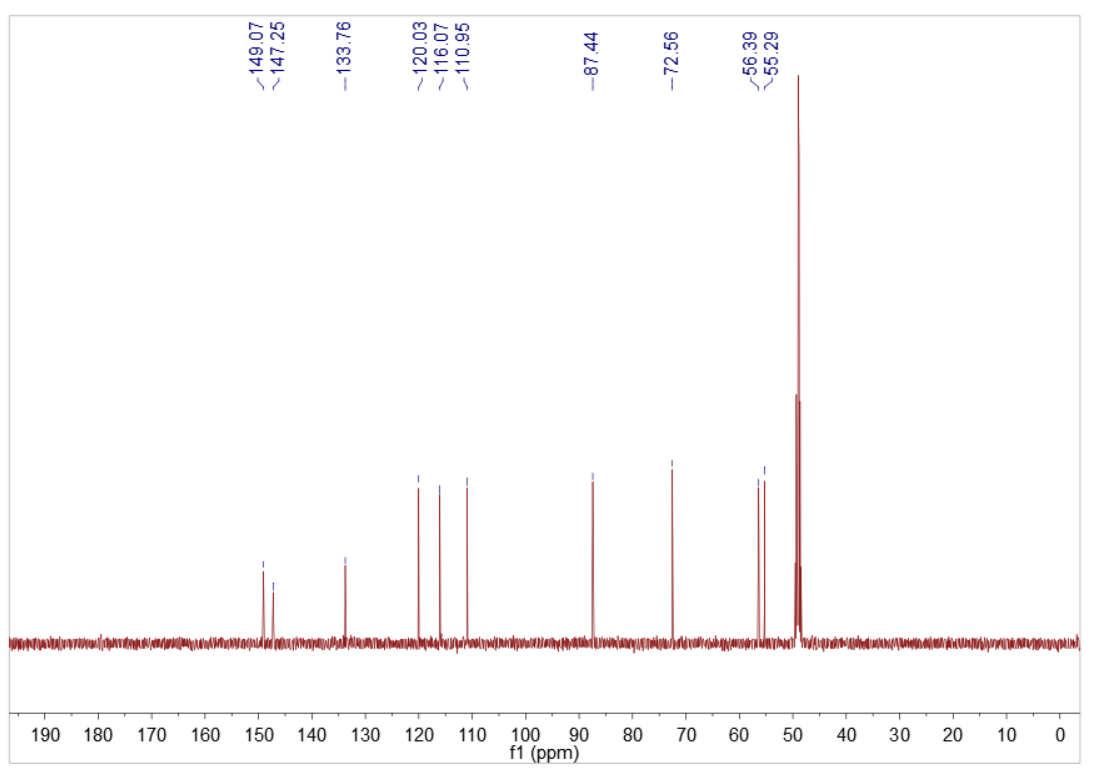


# Fig. S33. 13C NMR spectrum of 8 in CD3OD


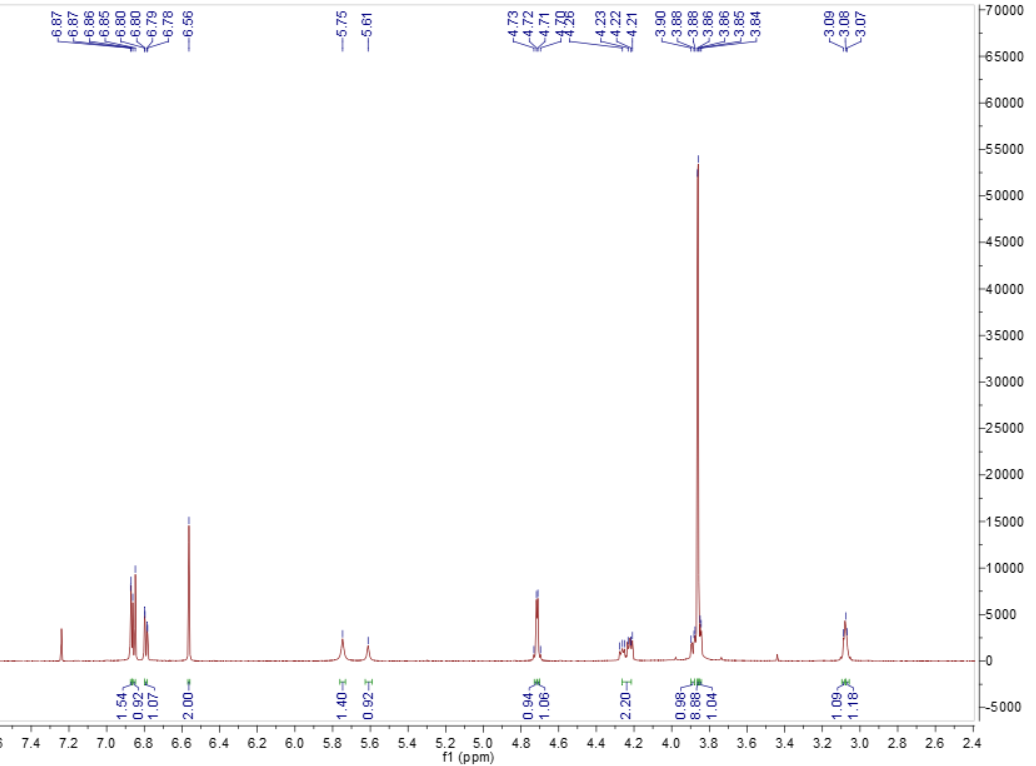


# Fig. S34. 1H NMR spectrum of 9 in CDCl3


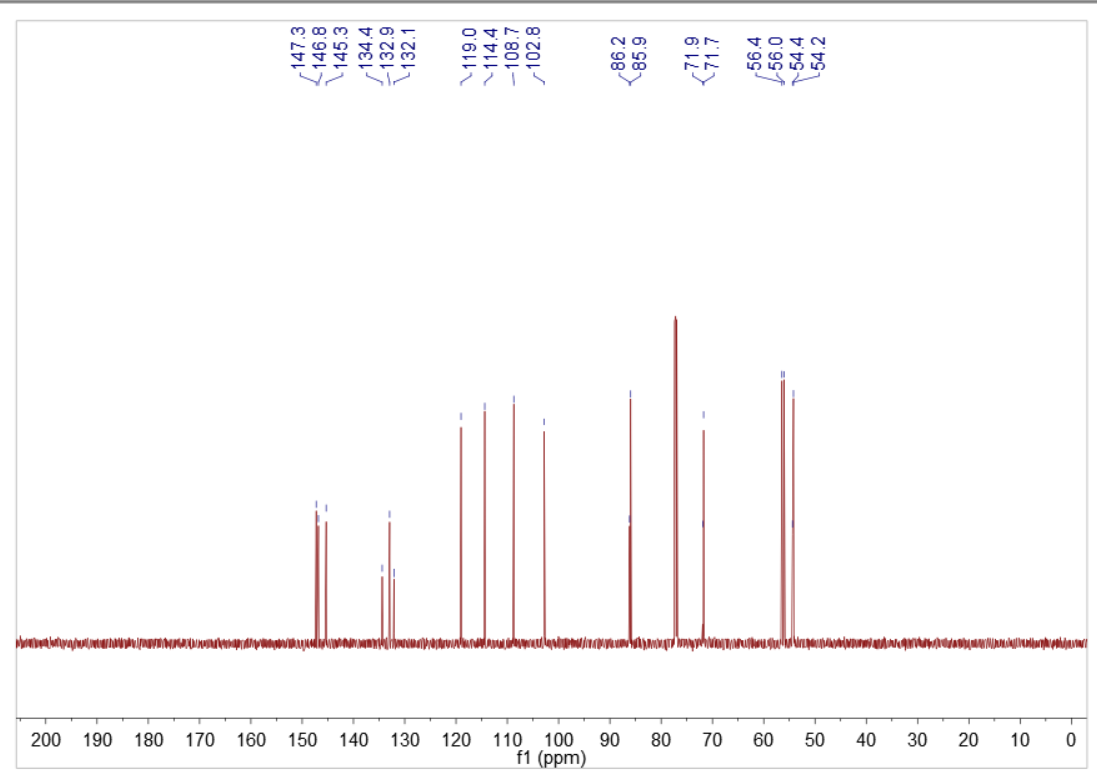


# Fig. S35. 13C NMR spectrum of 9 in CDCl3


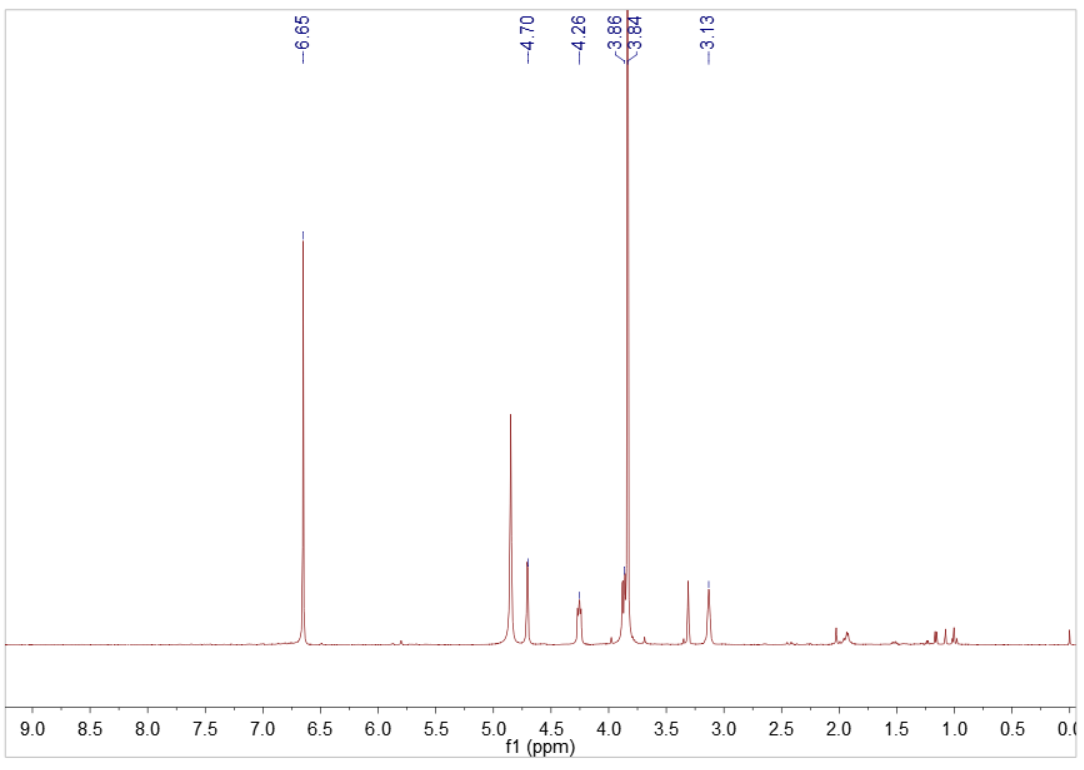


# Fig. S36. 1H NMR spectrum of 10 in CD3OD


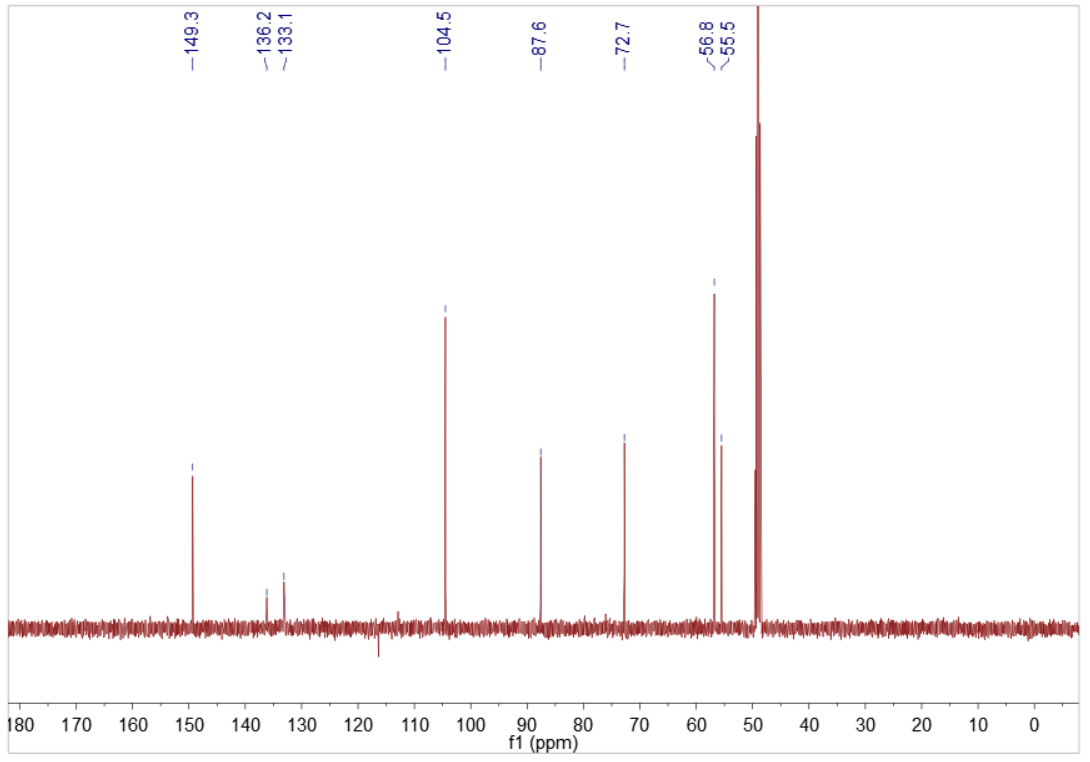


# Fig. S37. 13C NMR spectrum of 10 in CD3OD


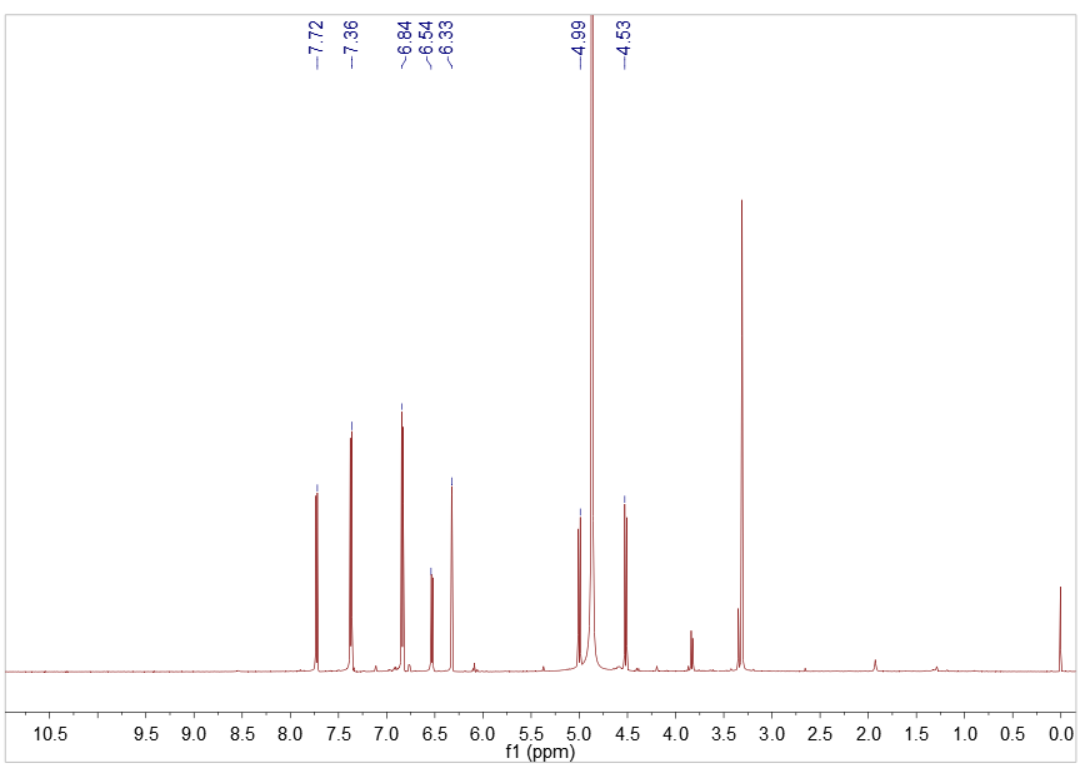


# Fig. S38. 1H NMR spectrum of 11 in CD3OD


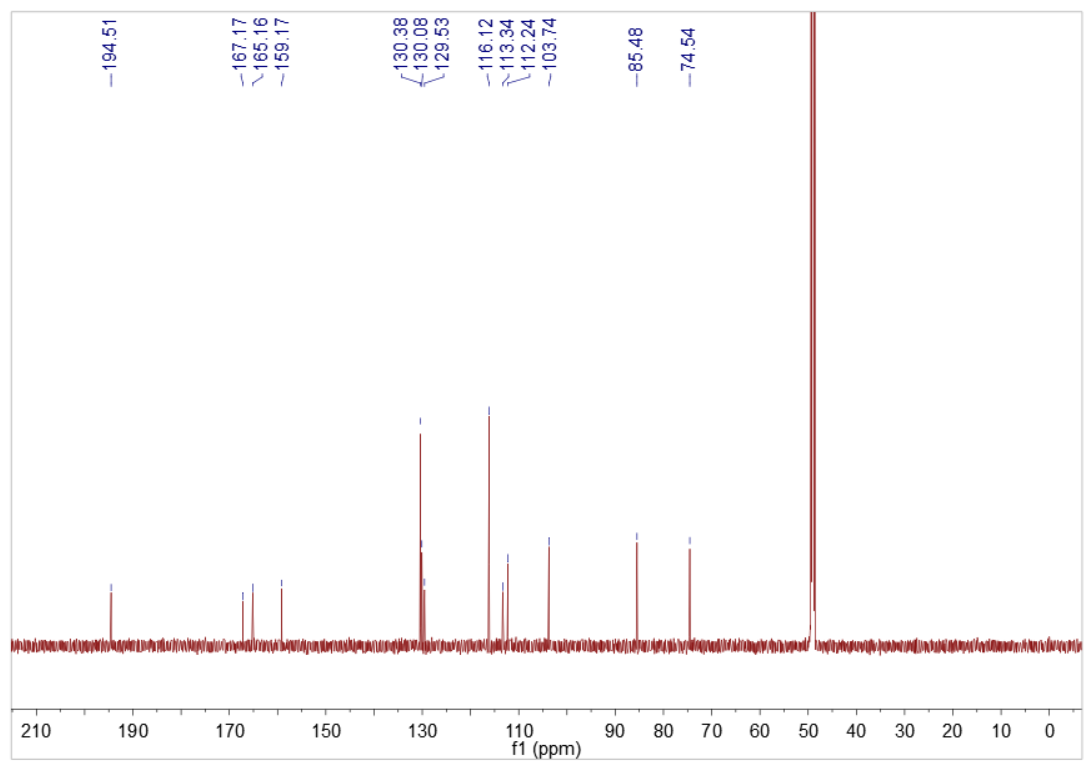


# Fig. S39. 13C NMR spectrum of 11 in CD3OD


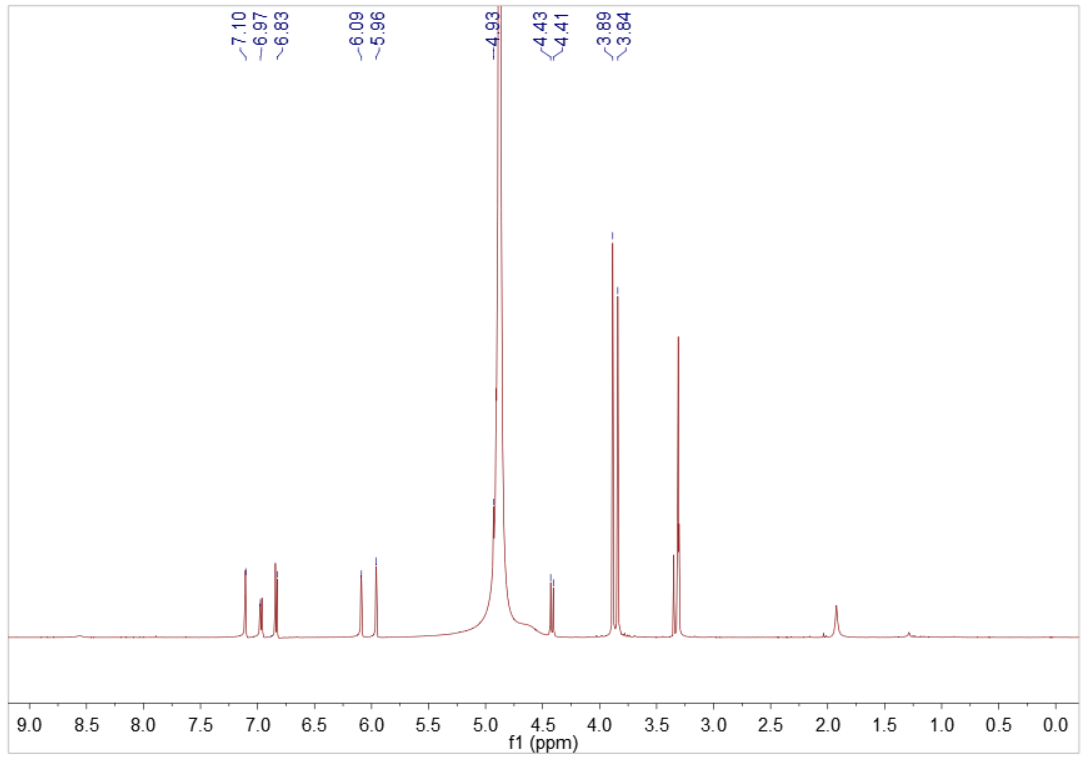


# Fig. S40. 1H NMR spectrum of 12 in CD3OD


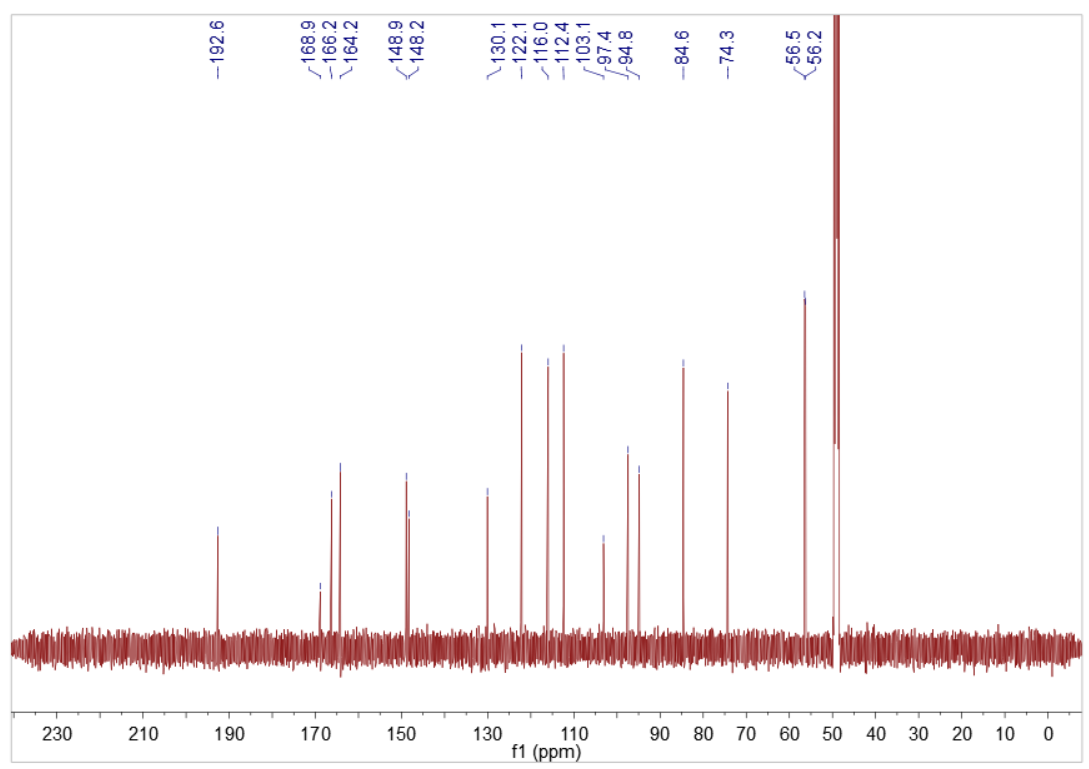


# Fig. S41. 13C NMR spectrum of 12 in CD3OD


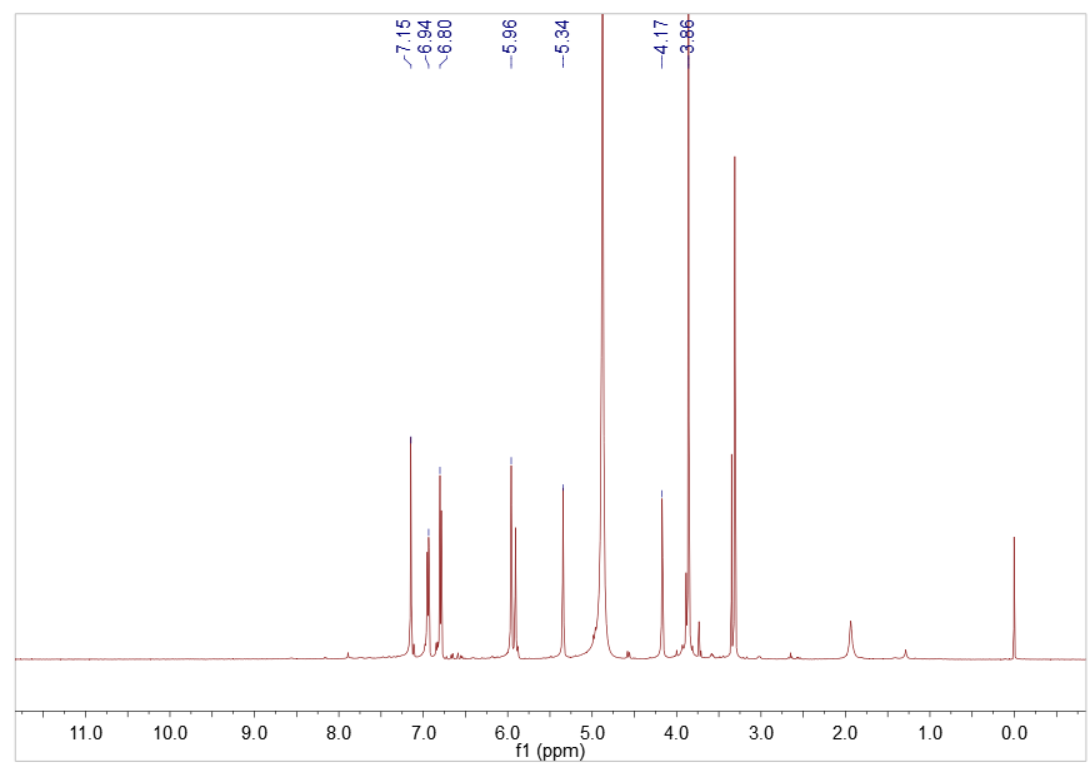


# Fig. S42. 1H NMR spectrum of 13 in CD3OD


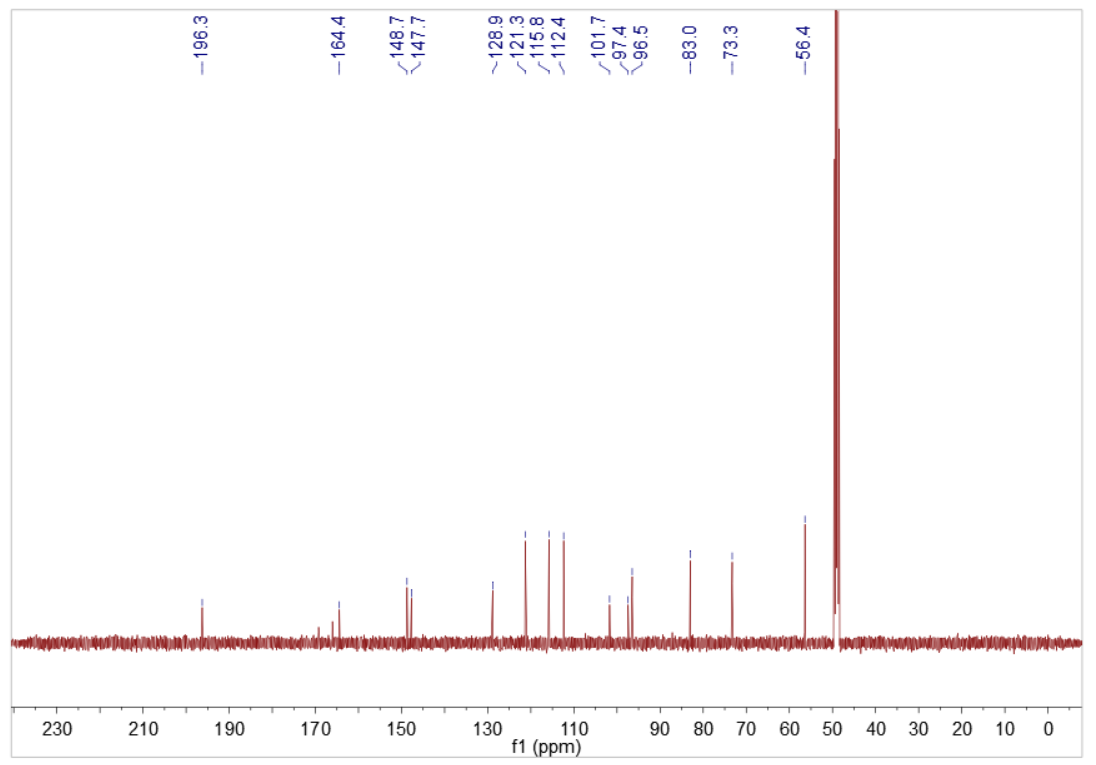


# Fig. S43. 13C NMR spectrum of 13 in CD3OD


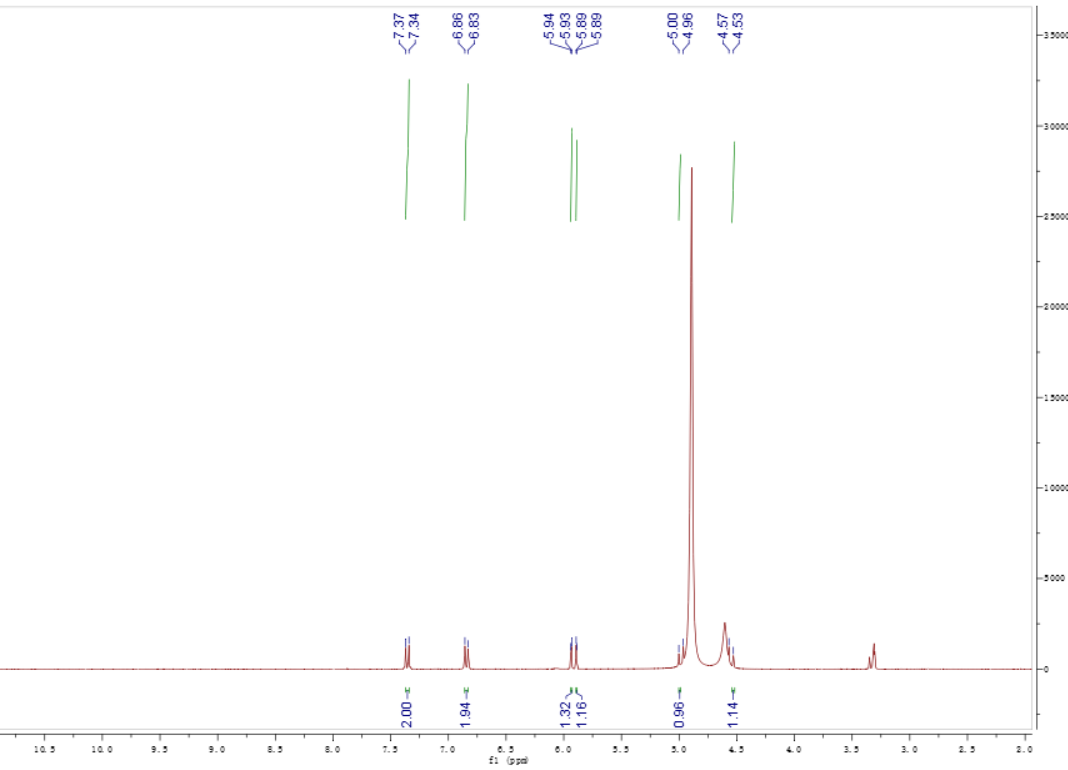


# Fig. S44. 1H NMR spectrum of 14 in CD3OD


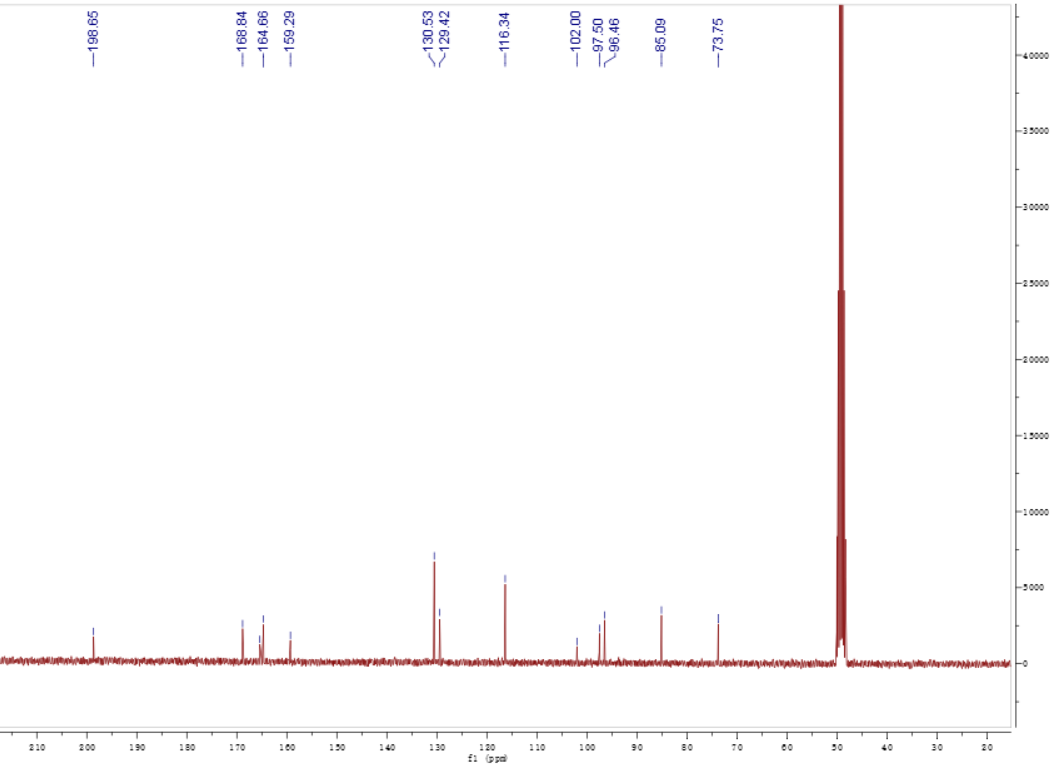


# Fig. S45. 13C NMR spectrum of 14 in CD3OD


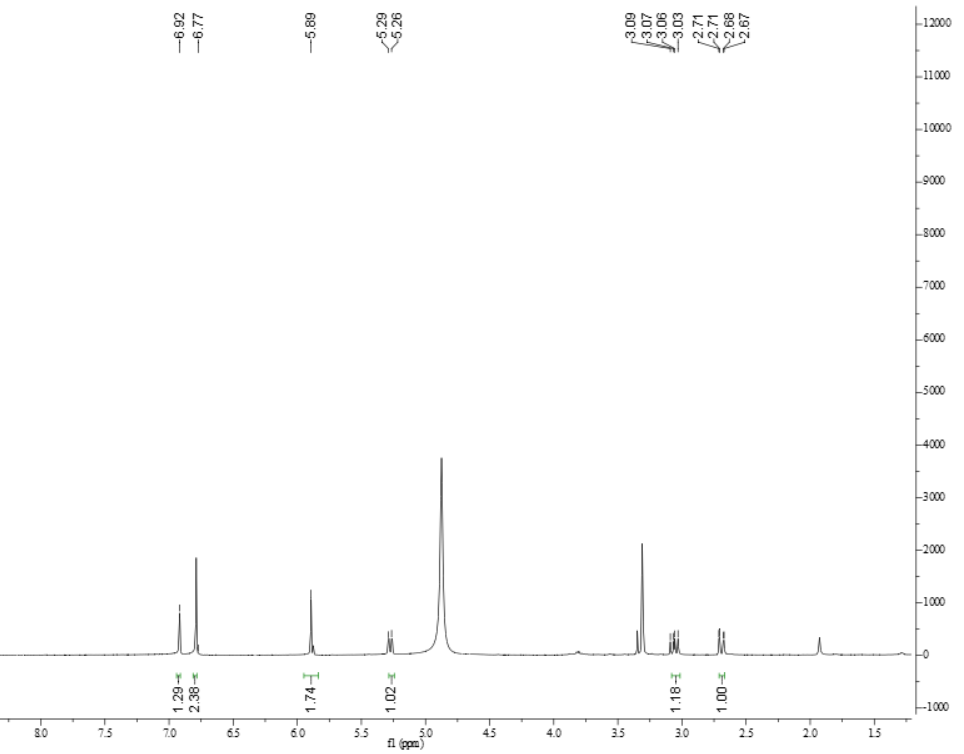


# Fig. S46. 1H NMR spectrum of 15 in CD3OD


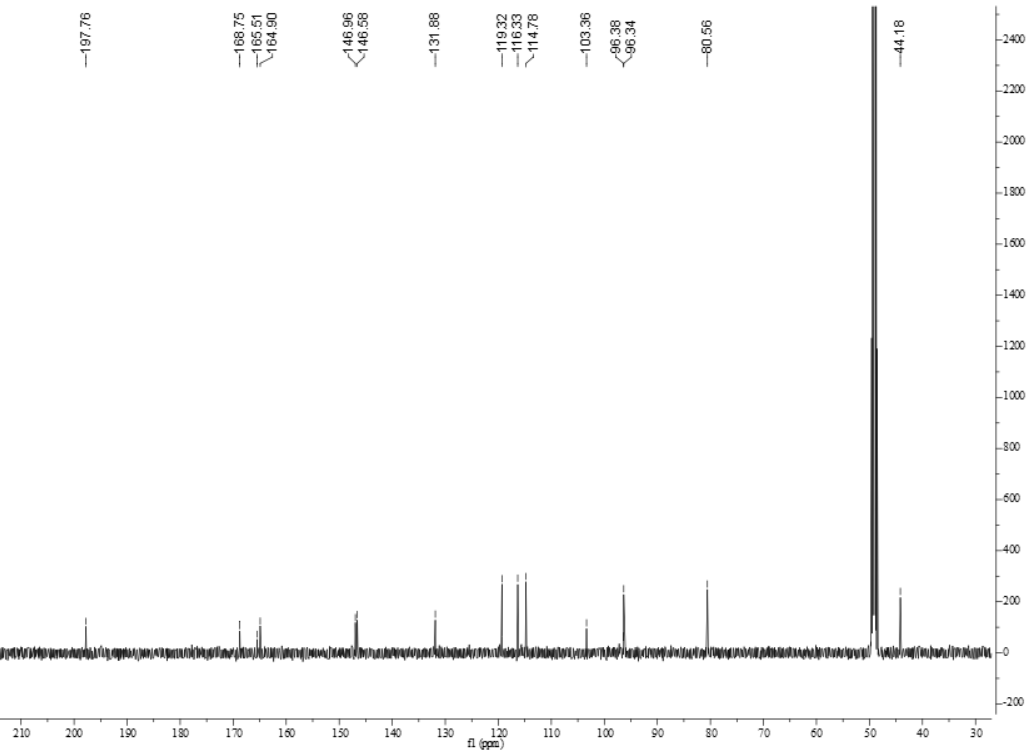


# Fig. S47. 13C NMR spectrum of 15 in CD3OD


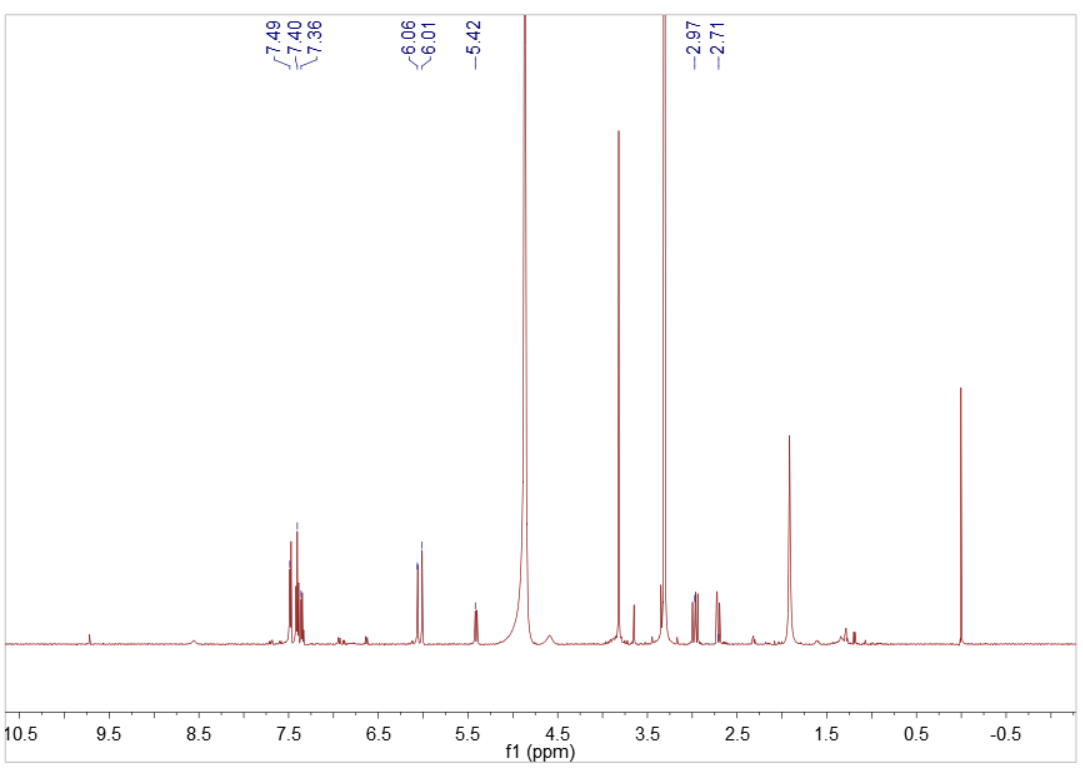


# Fig. S48. 1H NMR spectrum of 16 in CD3OD


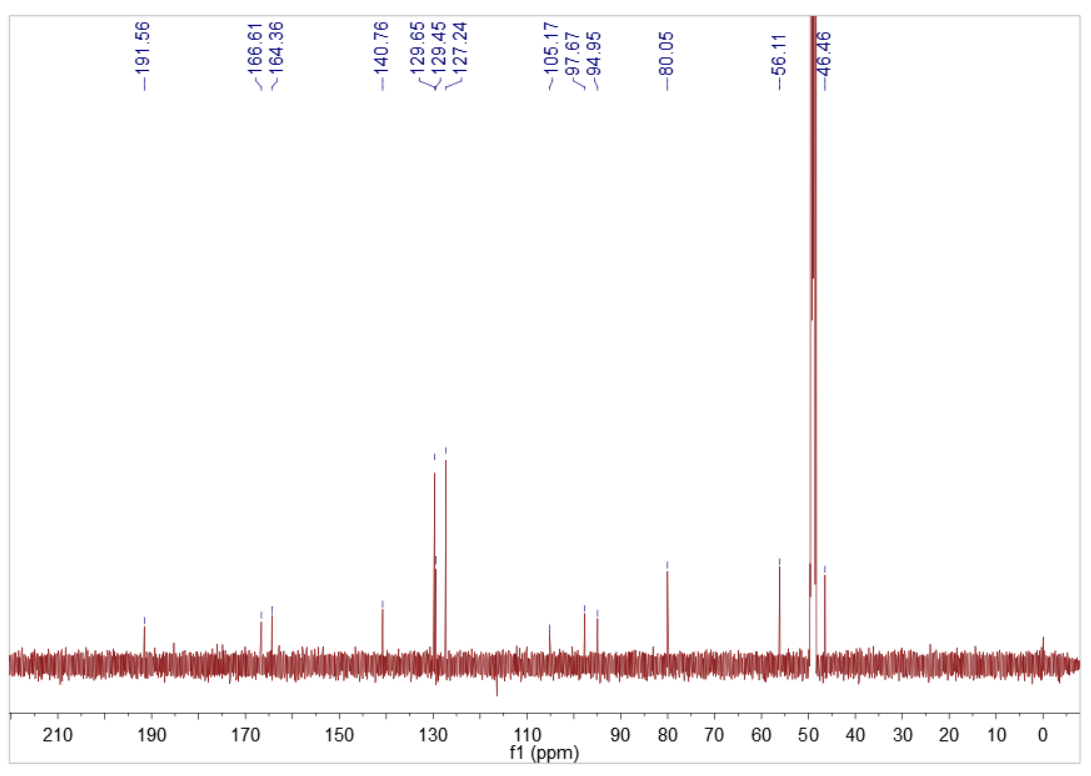


# Fig. S49. 13C NMR spectrum of 16 in CD3OD


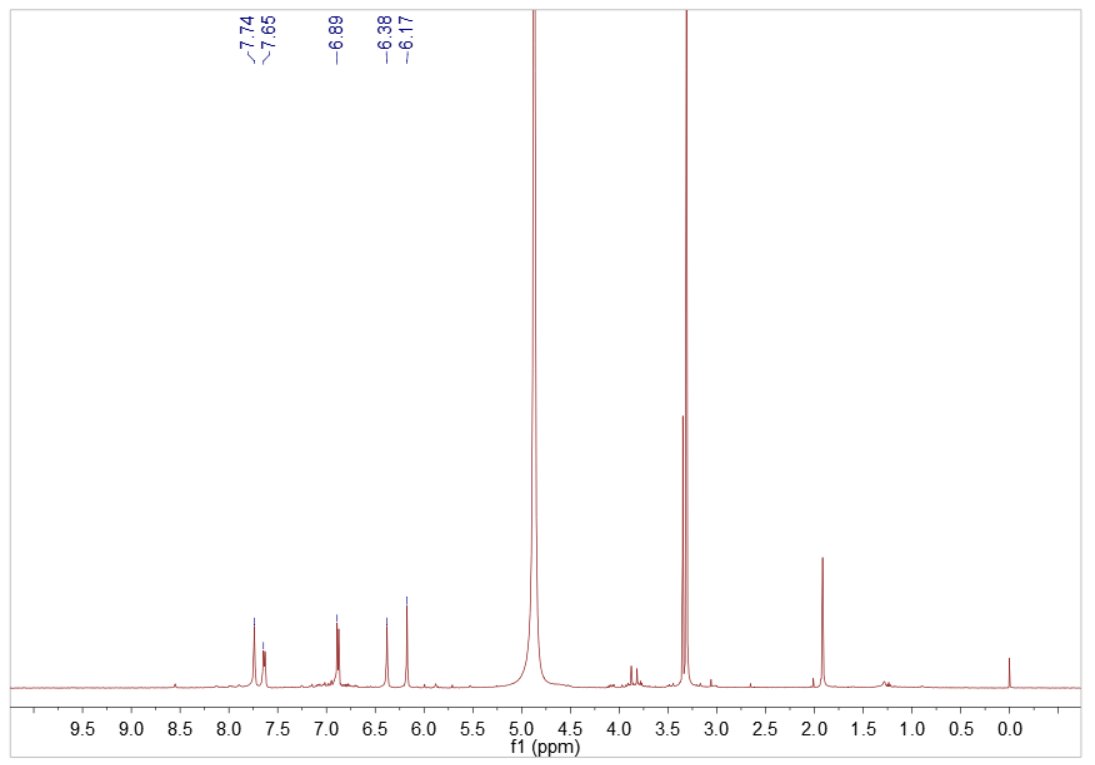


# Fig. S50. 1H NMR spectrum of 17 in CD3OD


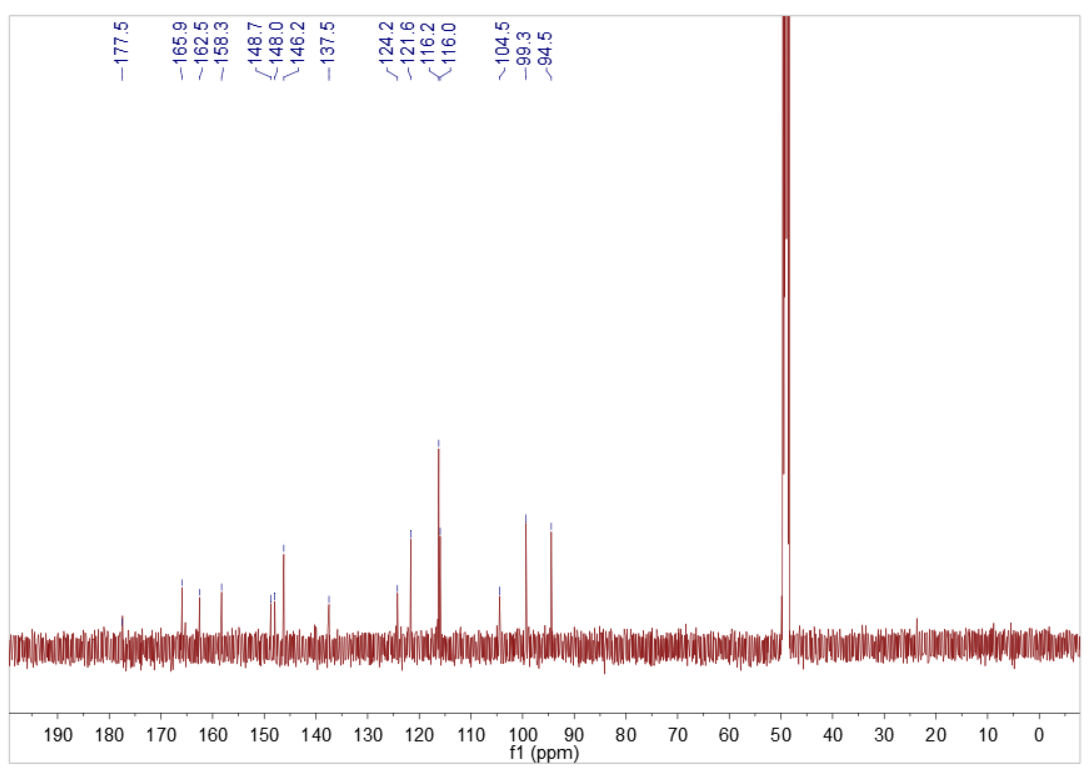


# Fig. S51. 13C NMR spectrum of 17 in CD3OD


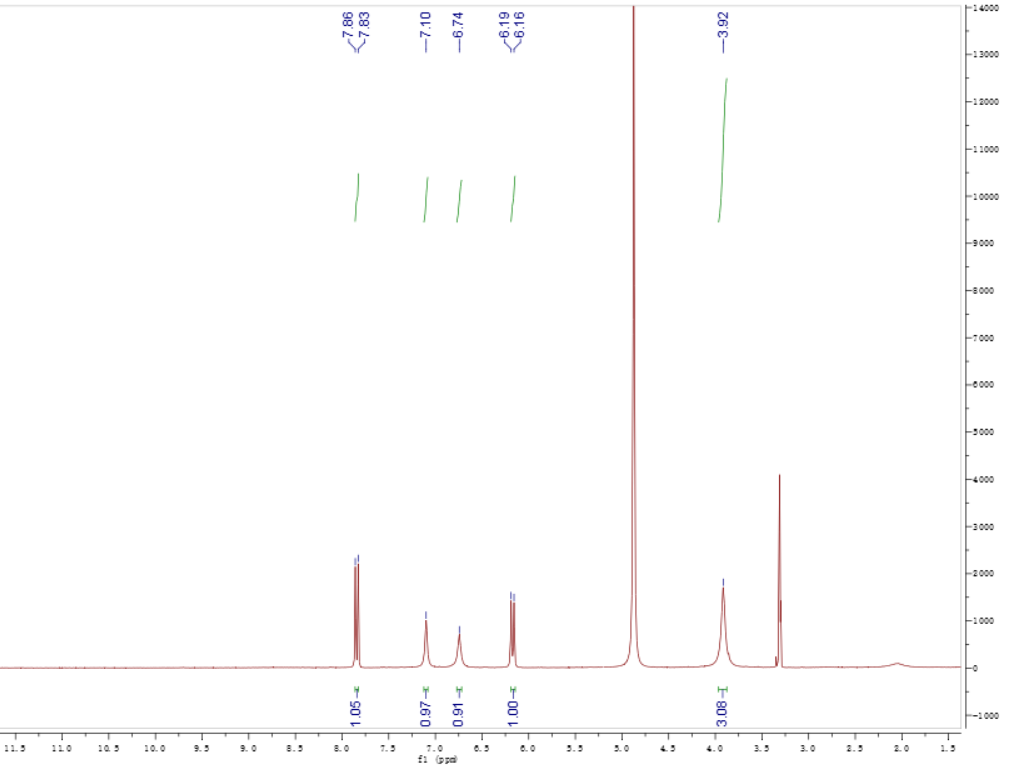


# Fig. S52. 1H NMR spectrum of 18 in CD3OD


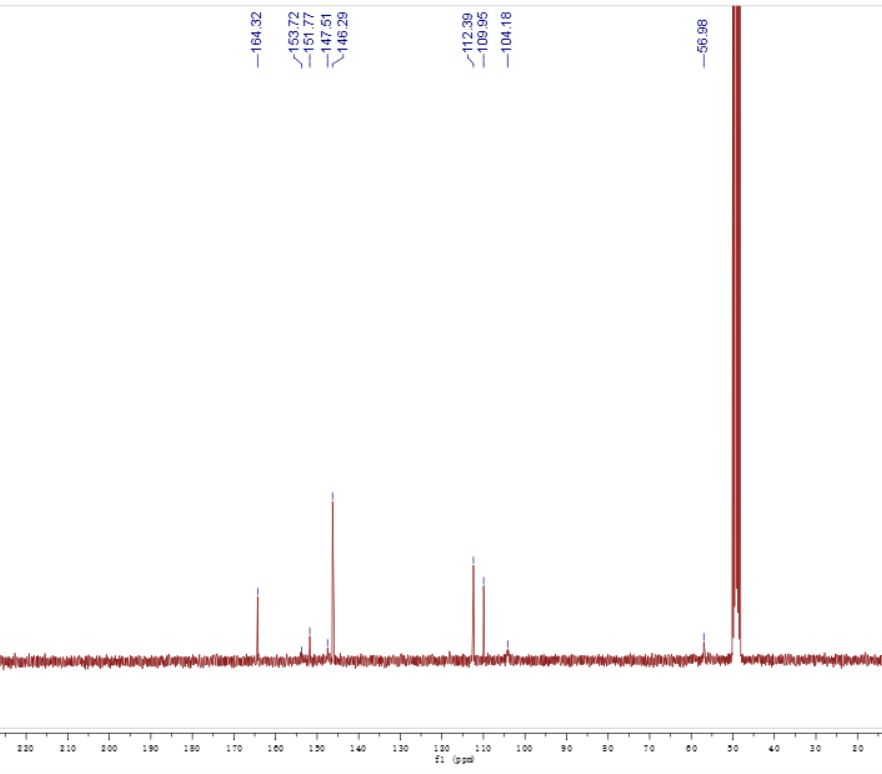


# Fig. S53. 13C NMR spectrum of 18 in CD3OD


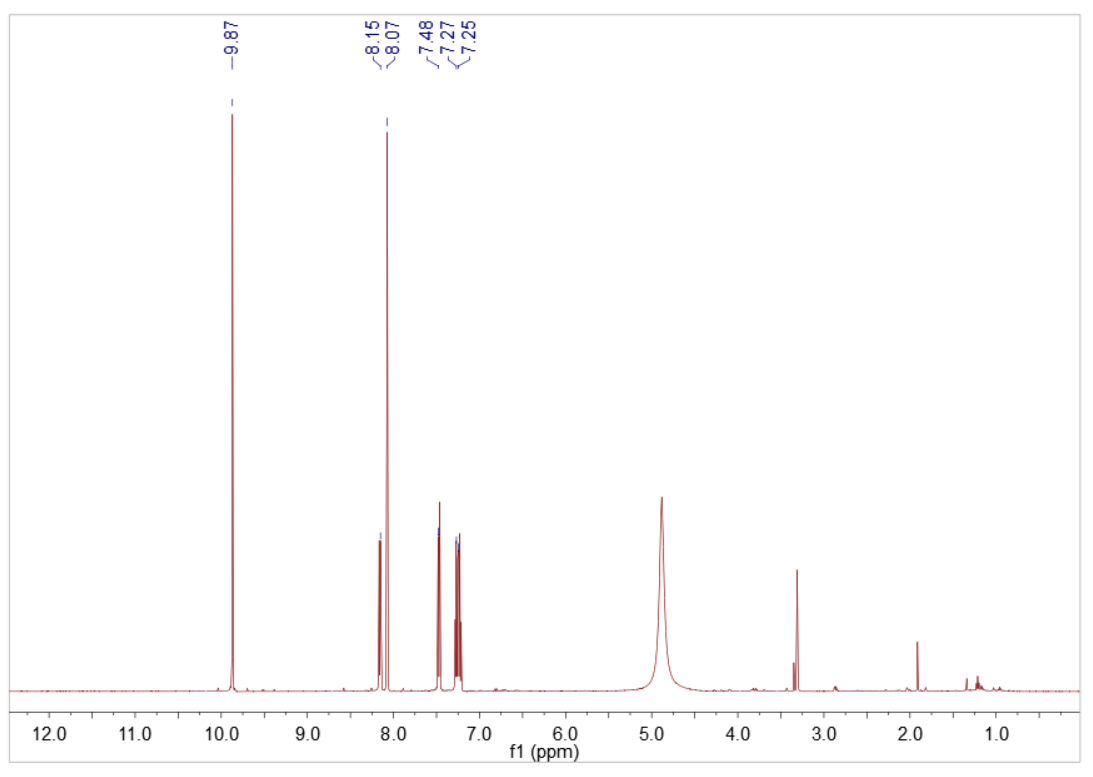


# Fig. S54. 1H NMR spectrum of 19 in CD3OD


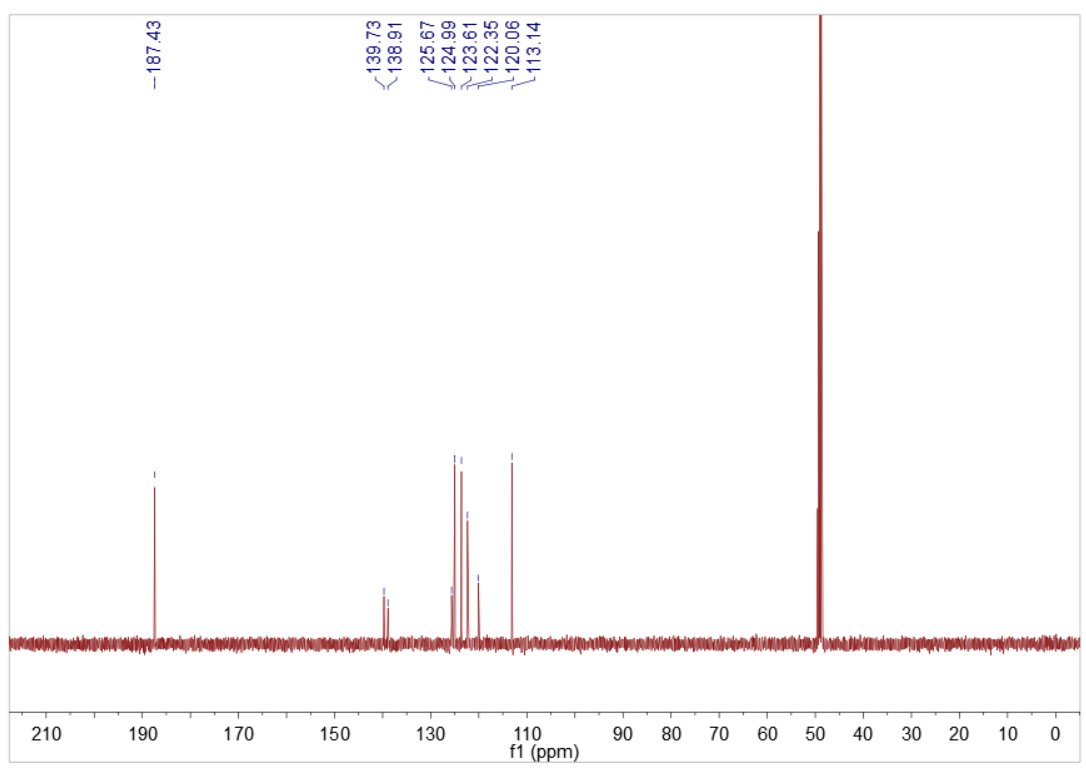


# Fig. S55. 13C NMR spectrum of 19 in CD3OD


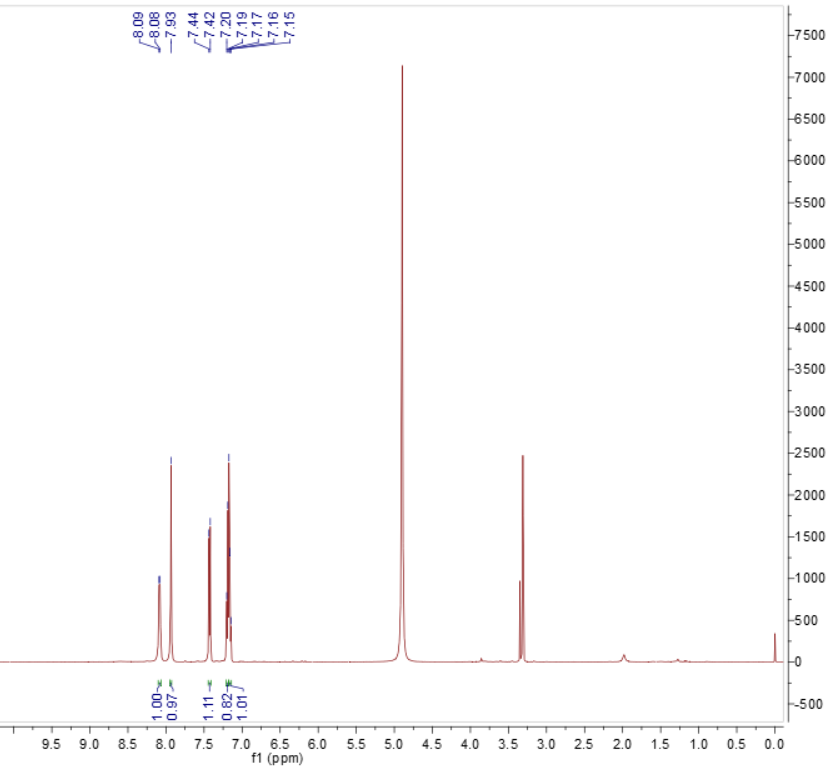


# Fig. S56. 1H NMR spectrum of 20 in CD3OD


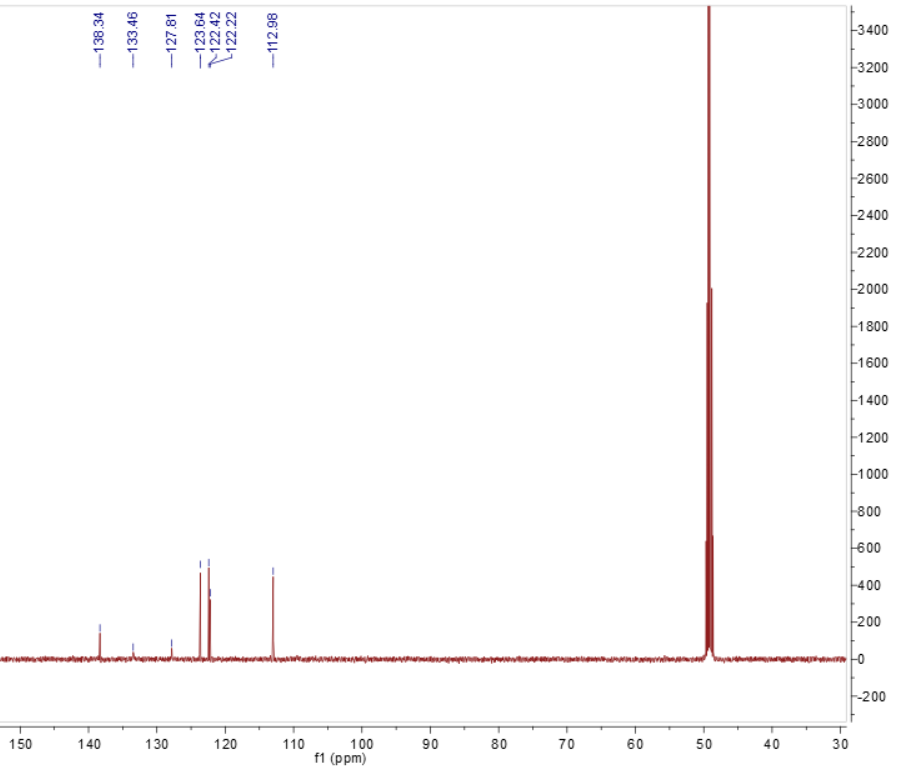


# Fig. S57. 13C NMR spectrum of 20 in CD3OD


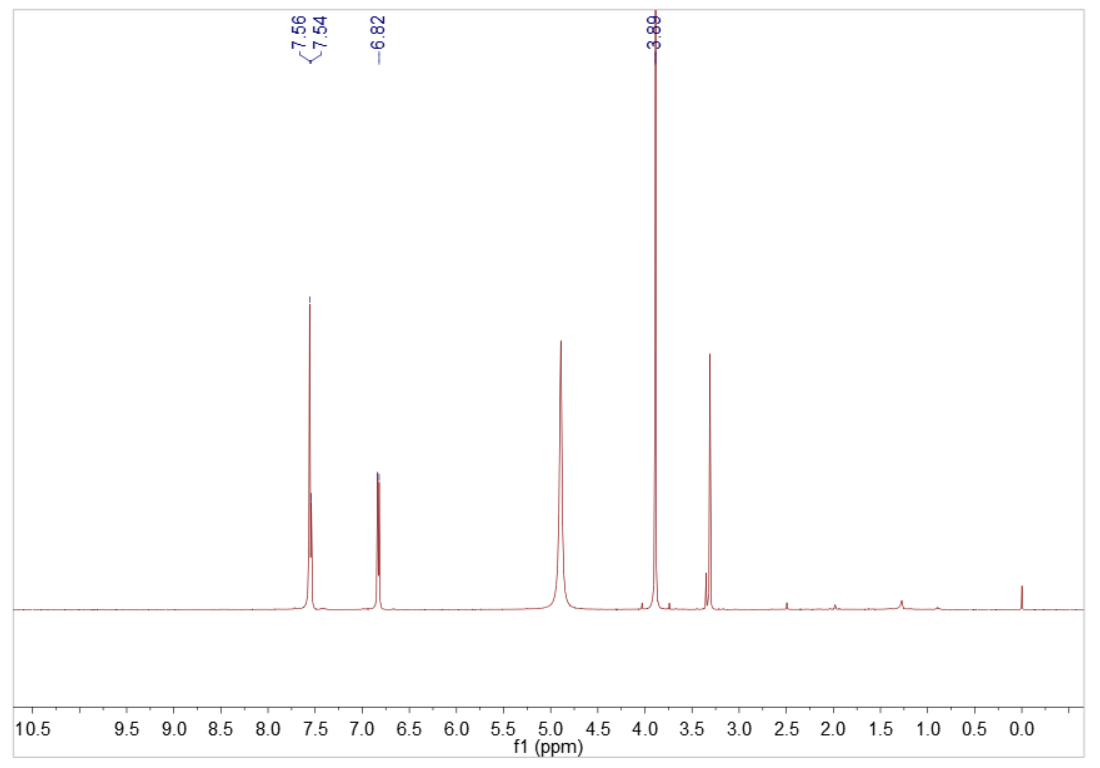


# Fig. S58. 1H NMR spectrum of 21 in CD3OD


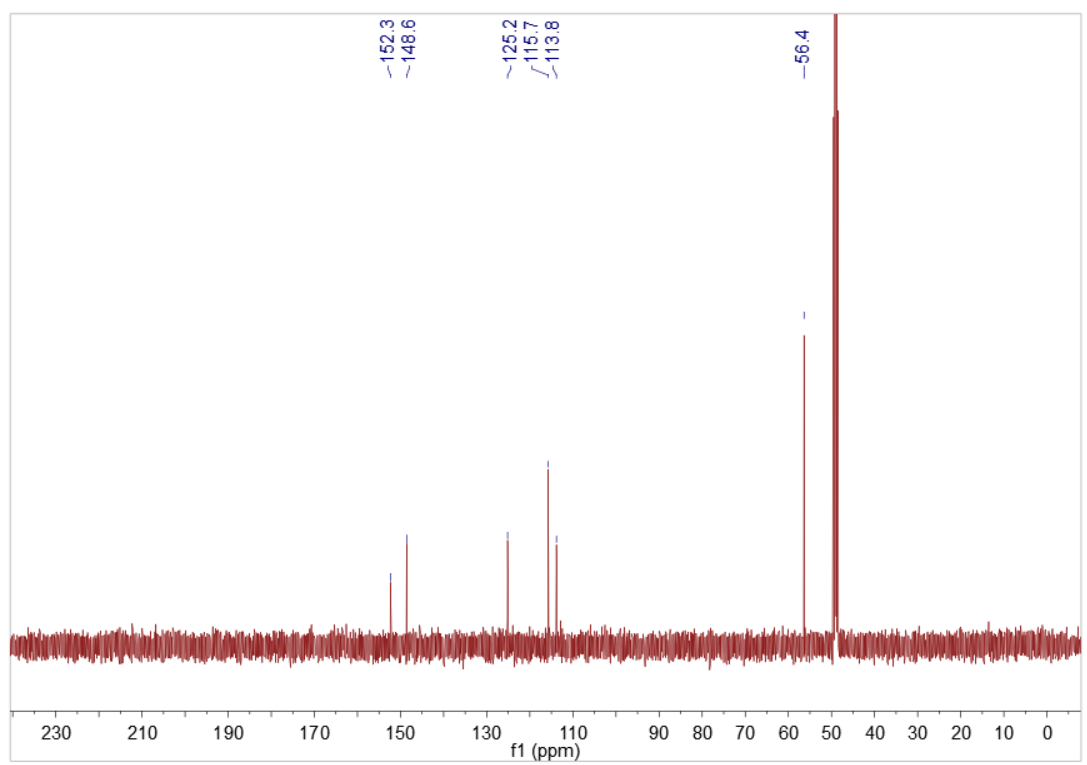


# Fig. S59. 13C NMR spectrum of 21 in CD3OD


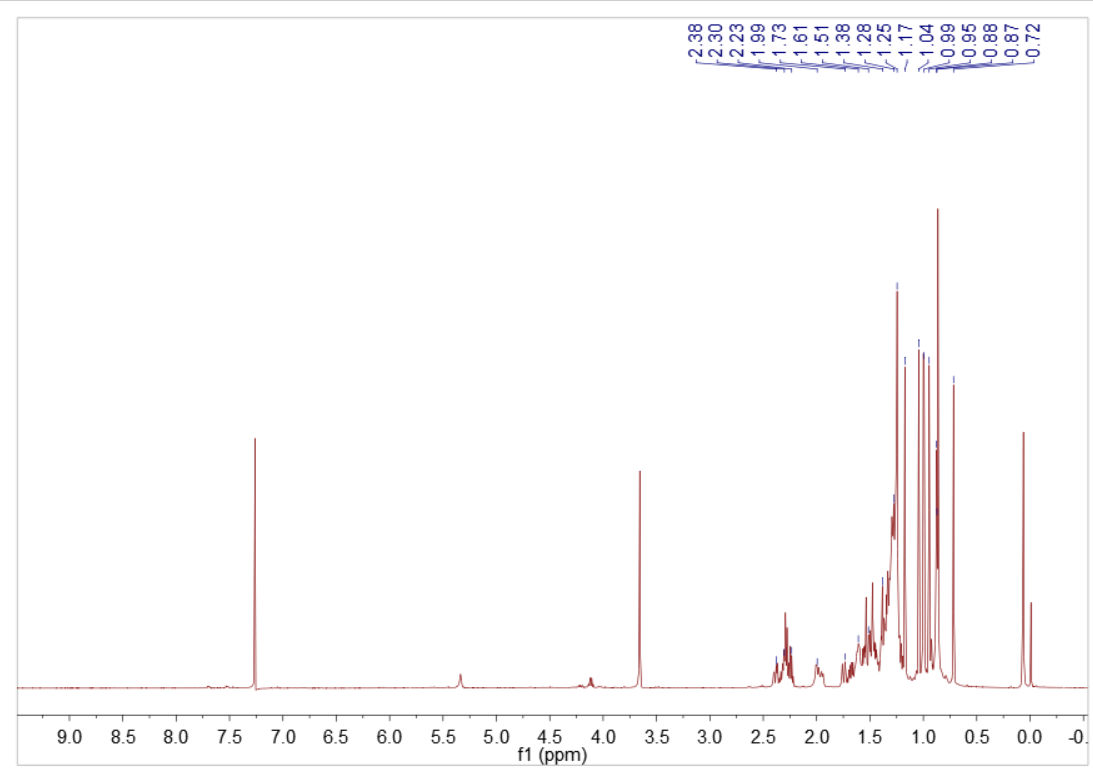


# Fig. S60. 1H NMR spectrum of 22 in CDCl3


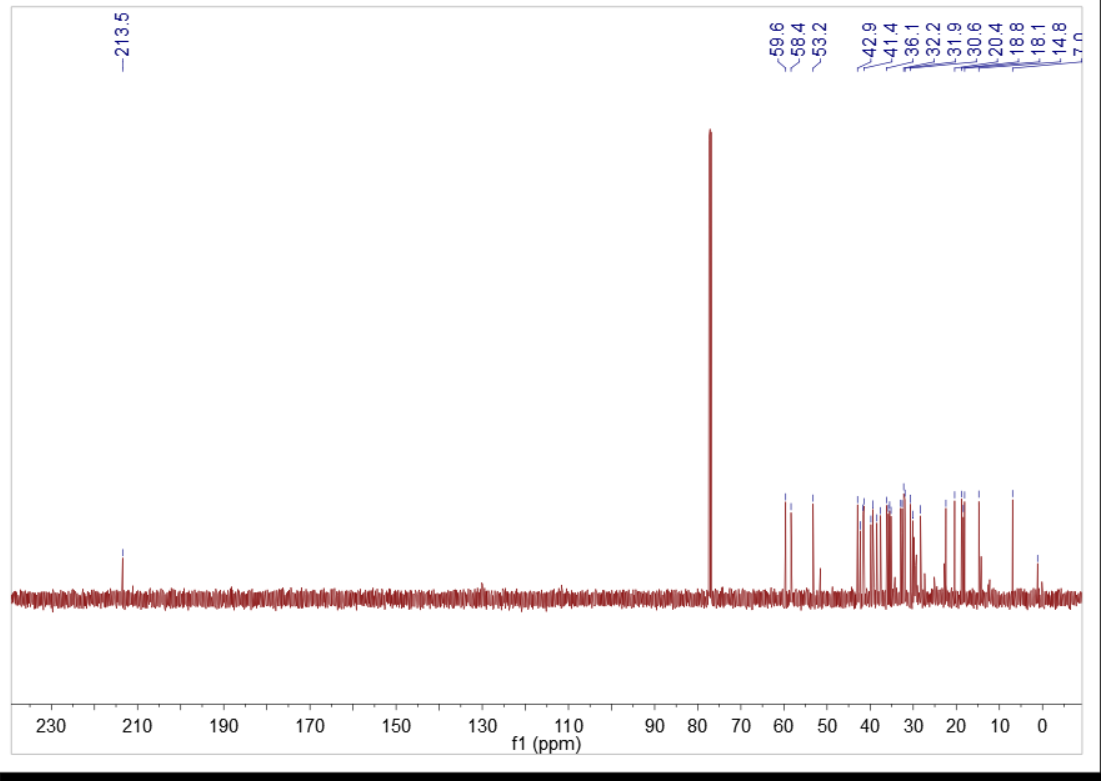


# Fig. S61. 13C NMR spectrum of 22 in CDCl3


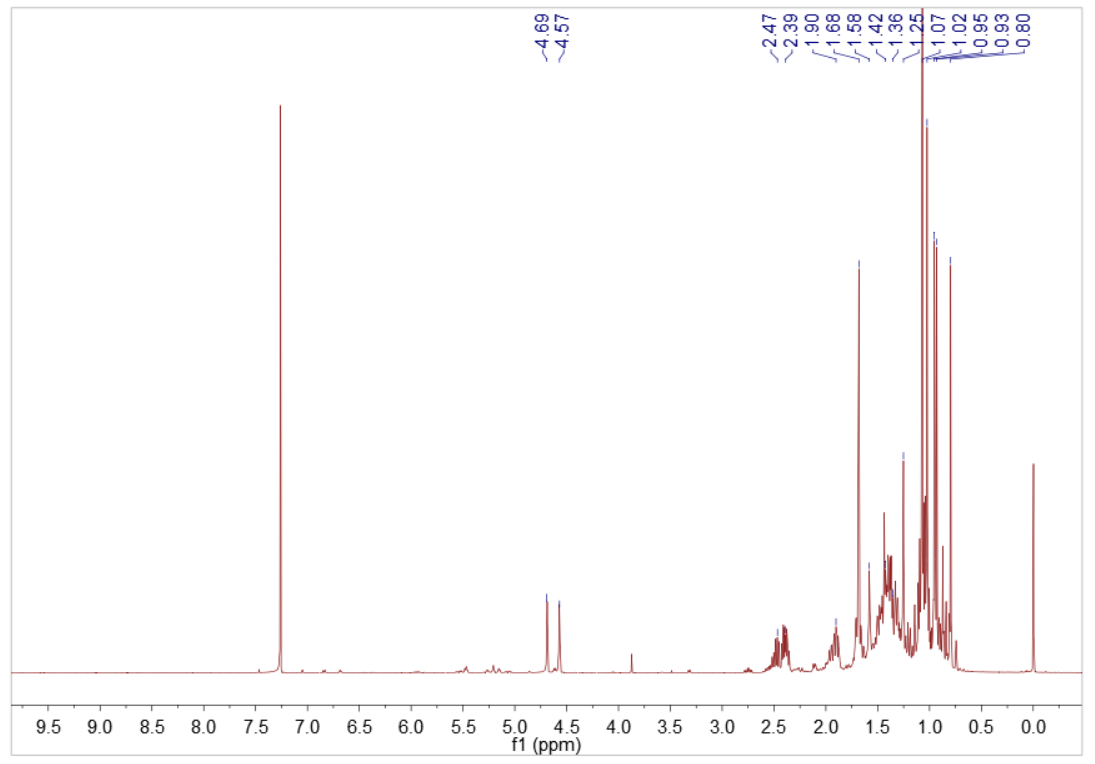


# Fig. S62. 1H NMR spectrum of 23 in CDCl3


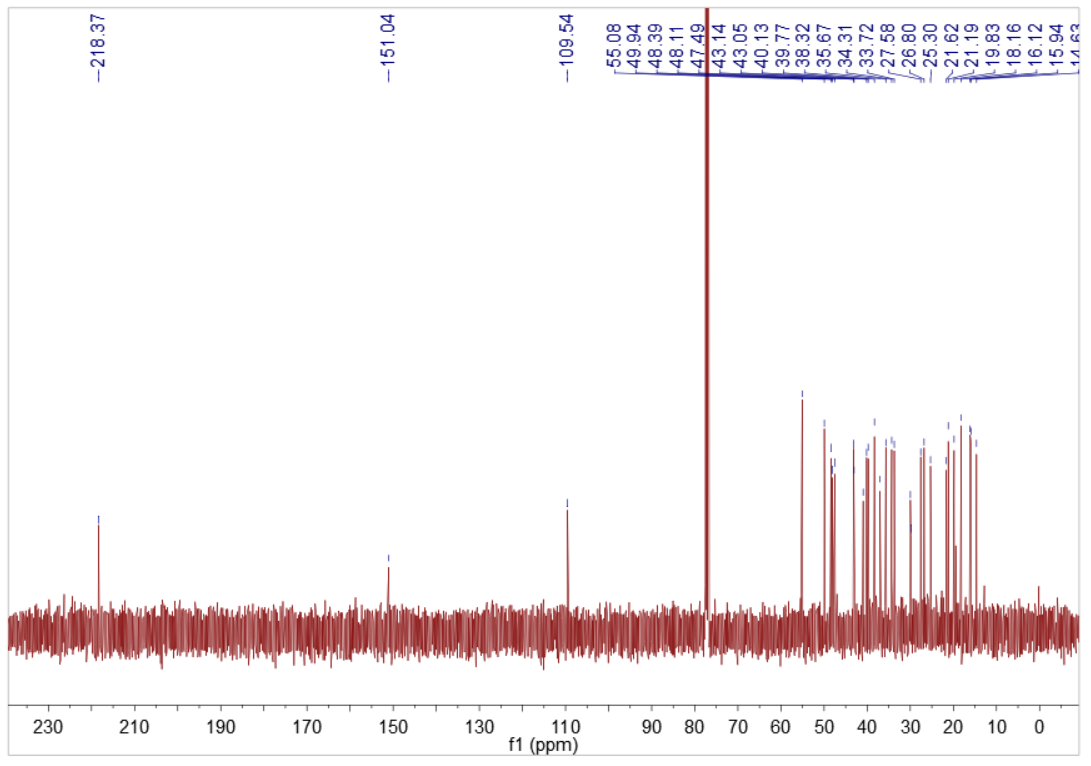


# Fig. S63. 13C NMR spectrum of 23 in CDCl3


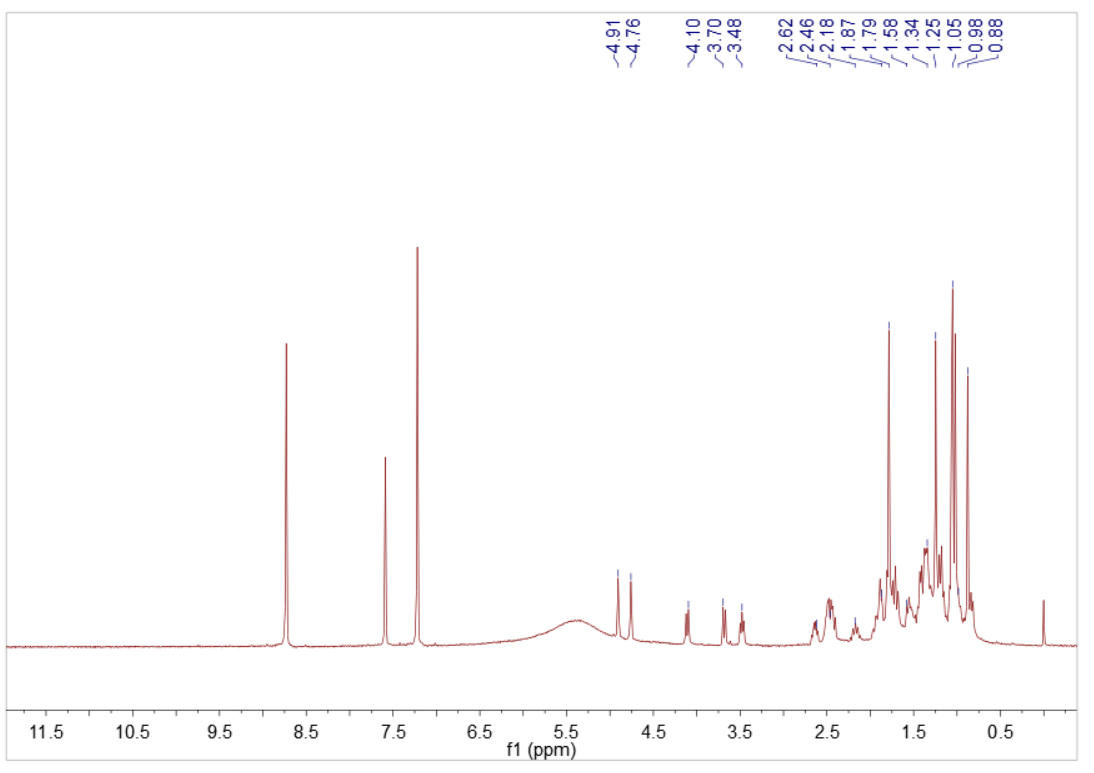


# Fig. S64. 1H NMR spectrum of 24 in C5D5N


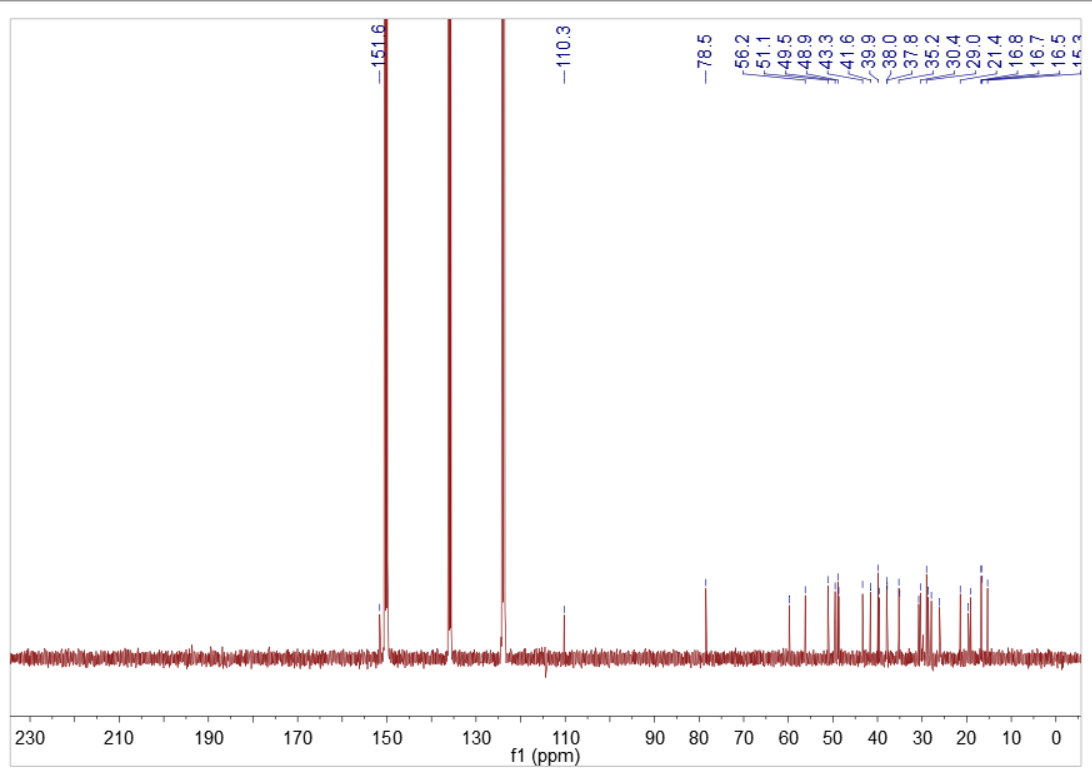


# Fig. S65. 13C NMR spectrum of 24 in C5D5N


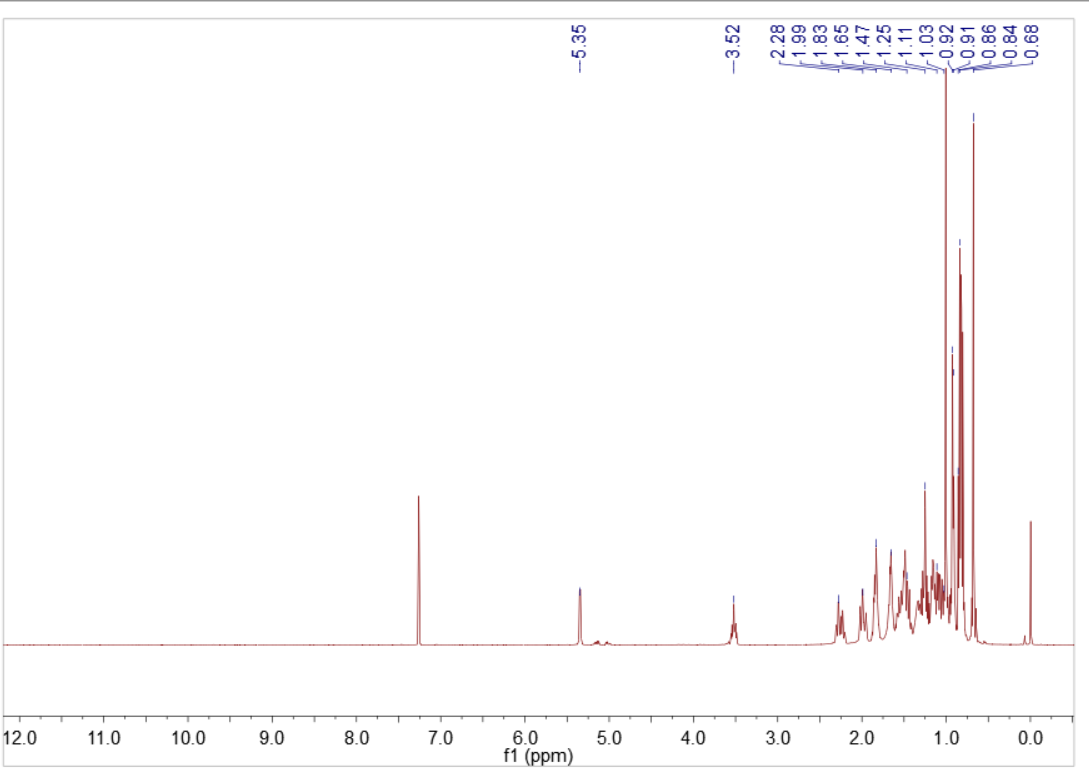


# Fig. S66. 1H NMR spectrum of 25 in CDCl3


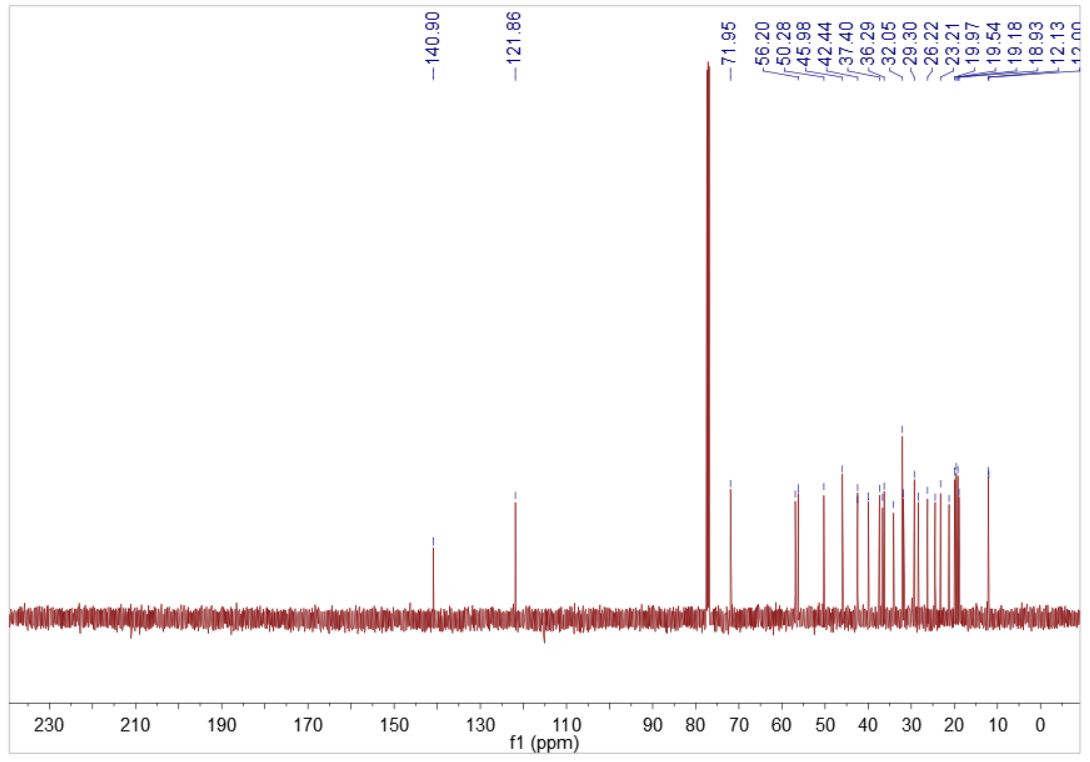


# Fig. S67. 13C NMR spectrum of 25 in CDCl3


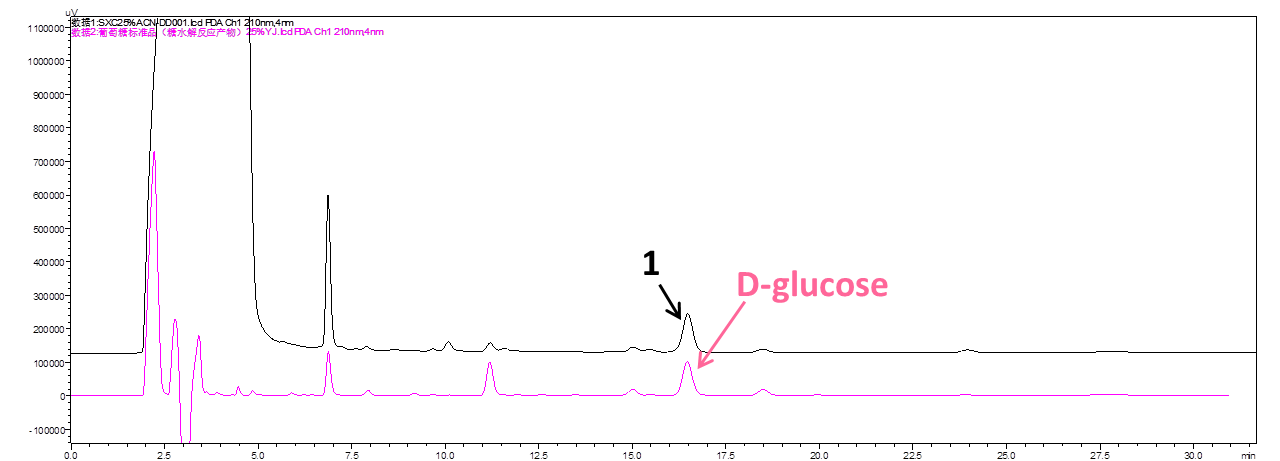


# Fig. S68. HPLC chromatogram of the acid hydrolysis of 1
